# Supplementary material for: Efficient hybrid de novo assembly of human genomes with WENGAN
Source: PubMed Central journal article supplement (PMC8041623; doi:10.1038/s41587-020-00747-w), 2020-12-14
Supplement: 41587_2020_747_MOESM1_ESM.pdf [file 41587_2020_747_MOESM1_ESM.pdf]

---

**Supplementary information**

---

**Efficient hybrid de novo assembly of human genomes with WENGAN**

---

In the format provided by the authors and unedited

# Supplementary Material: "Efficient hybrid de novo assembly of human genomes with WENGAN"

Alex Di Genova<sup>1,2</sup>, Elena Buena-Atienza<sup>3,4</sup>, Stephan Ossowski<sup>3,4</sup> and Marie-France Sagot<sup>1,2</sup>

<sup>1</sup>*Inria Grenoble Rhône-Alpes, 655, Avenue de l'Europe, 38334 Montbonnot, France.*

<sup>2</sup>*Université de Lyon, Université Lyon 1, CNRS, Laboratoire de Biométrie et Biologie Evolutive UMR 5558, F-69622 Villeurbanne, France*

<sup>3</sup>*Institute of Medical Genetics and Applied Genomics, University of Tübingen, Tübingen, Germany.*

<sup>4</sup>*NGS Competence Center Tübingen (NCCT), University of Tübingen, Tübingen, Germany.*

*Correspondence should be addressed to Alex Di Genova (email: digenova@gmail.com)*

## Contents

|                                                                              |          |
|------------------------------------------------------------------------------|----------|
| <b>1 Genomes assemblies</b>                                                  | <b>4</b> |
| 1.1 Short-read assemblies . . . . .                                          | 4        |
| 1.1.1 ABYSS . . . . .                                                        | 4        |
| 1.1.2 DISCOVARDENOVO . . . . .                                               | 4        |
| 1.1.3 MINIA3 . . . . .                                                       | 4        |
| 1.2 WENGAN assemblies . . . . .                                              | 5        |
| 1.2.1 WENGAN assemblies of NA12878, NA24385, HG00733, and CHM13 . . . . .    | 5        |
| 1.2.2 WENGAN assemblies of NA12878 at different long-read coverage . . . . . | 6        |
| 1.2.3 WENGAN assemblies of non-human genomes . . . . .                       | 7        |
| 1.3 FLYE assemblies . . . . .                                                | 8        |
| 1.3.1 FLYE assemblies at different long-read coverage . . . . .              | 8        |
| <b>2 Polishing FLYE assemblies</b>                                           | <b>8</b> |
| 2.1 Polishing with short and long reads . . . . .                            | 8        |

## List of Figures

|                         |                                                                                           |    |
|-------------------------|-------------------------------------------------------------------------------------------|----|
| Supplementary Figure 1  | Example of a chimeric contig detected by INTERVALMISS . . .                               | 24 |
| Supplementary Figure 2  | Chimeric MINIA3 contigs detected by INTERVALMISS . . .                                    | 25 |
| Supplementary Figure 3  | Spectrum of synthetic mate-pair libraries . . . . .                                       | 26 |
| Supplementary Figure 4  | Concordance of the mate-edge lengths before and after gap<br>filling . . . . .            | 27 |
| Supplementary Figure 5  | NGx and NGAx of CHM13 assemblies . . . . .                                                | 27 |
| Supplementary Figure 6  | Analysis of Segmental Duplication sequences resolved in<br>the CHM13 assemblies . . . . . | 28 |
| Supplementary Figure 7  | DotPlots of contigs mapped to the CHM13 T2T-X chromo-<br>some (v.07) . . . . .            | 29 |
| Supplementary Figure 8  | The MHC Region is spanned in a single contig in the CHM13<br>assemblies . . . . .         | 30 |
| Supplementary Figure 9  | NGx and NGAx of NA12878, HG00733, and NA24385<br>assemblies . . . . .                     | 31 |
| Supplementary Figure 10 | Distribution of the WENGAN consensus errors . . . . .                                     | 32 |
| Supplementary Figure 11 | Assembly of the complex MHC region in diploid genomes . .                                 | 33 |
| Supplementary Figure 12 | Analysis of Segmental Duplication sequences resolved in<br>diploid genomes . . . . .      | 34 |
| Supplementary Figure 13 | Assembly of the complex MHC region at different long-read<br>coverage . . . . .           | 35 |

## List of Tables

|                        |                                                                                                                   |    |
|------------------------|-------------------------------------------------------------------------------------------------------------------|----|
| Supplementary Table 1  | Long read data . . . . .                                                                                          | 10 |
| Supplementary Table 2  | Short read data . . . . .                                                                                         | 11 |
| Supplementary Table 3  | Public long-read and hybrid assemblies used for benchmarking                                                      | 12 |
| Supplementary Table 4  | QUAST validation of the CHM13 assemblies . . . . .                                                                | 13 |
| Supplementary Table 5  | BAC evaluation of the CHM13 assemblies . . . . .                                                                  | 14 |
| Supplementary Table 6  | Repeat class benchmark using the CHM13 T2T-X chromosome (v.07) . . . . .                                          | 14 |
| Supplementary Table 7  | Short read assemblies . . . . .                                                                                   | 15 |
| Supplementary Table 8  | QUAST validation of the diploid assemblies . . . . .                                                              | 16 |
| Supplementary Table 9  | BAC/Fosmid evaluation of the NA12878 (rel5) and HG00733 assemblies . . . . .                                      | 17 |
| Supplementary Table 10 | Polishing the FLYE(v2.4) assembly of NA12878 with short (HiSeq 50X) and long (ONT rel5 40X) reads . . . . .       | 18 |
| Supplementary Table 11 | Long-read coverage tritiation . . . . .                                                                           | 18 |
| Supplementary Table 12 | WENGAN and FLYE assemblies of NA12878 at different long-read coverage. . . . .                                    | 19 |
| Supplementary Table 13 | Fosmid evaluation of the WENGAN and FLYE assemblies of NA12878 (flipflop dataset) . . . . .                       | 20 |
| Supplementary Table 14 | Polishing the FLYE(v2.5) assembly of NA12878 with short (NovaSeq 53X) and long (ONT flipflop 30X) reads . . . . . | 21 |
| Supplementary Table 15 | WENGAN assemblies of non-human genomes . . . . .                                                                  | 22 |
| Supplementary Table 16 | BAC and Fosmid sequences used to assess consensus accuracy                                                        | 22 |
| Supplementary Table 17 | Short and long reads datasets of non-human genomes . . . . .                                                      | 23 |

# 1 Genomes assemblies

## 1.1 Short-read assemblies

### 1.1.1 ABYSS

---

```
#Abyss version 2.1.5

#NA12878 2x150bp HiSeq 2500
abyss-pe name=NA12878-abyss-ILL60X150 np=20 k=96 lib="pea peb" pea="BH88WKADXX.R1.fastq.gz BH88WKADXX.R2.fastq.gz"
      peb="AH81VLADXX.R1.fastq.gz AH81VLADXX.R2.fastq.gz" B=40G H=4 kc=3 v=-v contigs

#NA12878 2x150bp NovaSeq
abyss-pe name=NA12878-abyss-NS np=20 k=96 lib="pea" pea="S22_L001_R1_001.fastq.gz S22_L001_R2_001.fastq.gz" B=40G H=4 kc=3 v=-v
      contigs

# NA12878 2x150bp MGI-2000
abyss-pe name=NA12878-abyss-MGI np=20 k=96 lib="pe1 pe2" pe1="NA12878EBA.bgi.fwd.fastq.gz NA12878EBA.bgi.rev.fastq.gz"
      pe2="MGISEQ.sample.fwd.gz MGISEQ.sample.rev.gz" B=40G H=4 kc=3 v=-v contigs
```

---

### 1.1.2 DISCOVARDENOVO

---

```
#Discover version discovarexp-51885
DISCO=/path/DiscoverExp
export MALLOC_PER_THREAD=1

#NA12878 2x250bp HiSeq 2500
${DISCO} READS="SRR891258_{1,2}.fastq.gz,SRR891259_{1,2}.fastq.gz" NUM_THREADS=44 OUT_DIR=60XNA12878

#NA12878 2x150bp NovaSeq
${DISCO} READS="S22_L001_R{1,2}_001.fastq.gz" NUM_THREADS=44 OUT_DIR=NA12878NS

# NA12878 2x150bp MGI-2000
${DISCO} READS="NA12878EBA.bgi.R{1,2}.fastq.gz,MGISEQ.sample.R{1,2}.fastq.gz" NUM_THREADS=44 OUT_DIR=NA12878MGI
# NA24385
# prior to assembly the reads shorter than 100 bp were discarded with fastp
fastp -l 100 -i D1_S1S2_R1.fastq.gz -I D1_S1S2_R2.fastq.gz -o D1_S1S2T_R1.fastq.gz -O D1_S1S2T_R2.fastq.gz
${DISCO} READS="D1_S1S2T_R{1,2}.fastq.gz" NUM_THREADS=44 OUT_DIR=60XNA24385

# HG00733
${DISCO} READS="SRR5534476_{1,2}.fastq.gz,SRR5534475_{1,2}.fastq.gz" NUM_THREADS=44 OUT_DIR=60XHG00733

#CHM13
${DISCO} READS="SRR3189741_{1,2}.fastq.gz,SRR3189742_{1,2}.fastq.gz" NUM_THREADS=44 OUT_DIR=60XCHM13
```

---

### 1.1.3 MINIA3

---

```
# Minia 3, git commit 017d23e
#NA12878 2x150bp HiSeq 2500
echo BH88WKADXX.R1.fastq.gz BH88WKADXX.R2.fastq.gz AH81VLADXX.R1.fastq.gz AH81VLADXX.R2.fastq.gz | xargs -n 1 > reads.txt
# the script run-minia.pl runs a mult-K assembly with kmer-sizes 41,81,121 and min k-mer frequencies of 2,2,2 respectively.
perl run-minia.pl -a reads.txt -c 20 -p NA12878-Hiseq

#NA12878 2x150bp NovaSeq
```

```

echo S22_L001_R1_001.fastq.gz S22_L001_R2_001.fastq.gz | xargs -n 1 > reads.txt
perl run-minia.pl -a reads.txt -c 20 -p NA12878-NS
# NA12878 2x150bp MGI-2000
echo NA12878EBA.bgi.fwd.fastq.gz NA12878EBA.bgi.rev.fastq.gz MGISEQ.sample.fwd.gz MGISEQ.sample.rev.gz | xargs -n 1 > reads.txt
perl run-minia.pl -a reads.txt -c 20 -p NA12878-MGI

```

---

The script *run-minia.pl* is part of the WENGAN code (directory `aux_scripts/run-minia.pl`).

## 1.2 WENGAN assemblies

### 1.2.1 WENGAN assemblies of NA12878, NA24385, HG00733, and CHM13

---

```

#NA12878
#Wengan
wengan.pl -x ontlon -a A -s AH81VLADXX.R1.fastq.gz,AH81VLADXX.R2.fastq.gz,BH88WKADXX.R1.fastq.gz,BH88WKADXX.R2.fastq.gz -l
na12878.rel15.fastq.gz -p na12878Wa -t 20 -g 3000
#WenganD high memory machine
wengan.pl -x ontlon -M 5000 -a D -s SRR891259_1.fastq.gz,SRR891259_2.fastq.gz,SRR891258_1.fastq.gz,SRR891258_2.fastq.gz -l
na12878.rel15.fastq.gz -p na12878Wd -t 44 -g 3000
#WenganM
perl wengan.pl -x ontlon -a M -s AH81VLADXX.R1.fastq.gz,AH81VLADXX.R2.fastq.gz,BH88WKADXX.R1.fastq.gz,BH88WKADXX.R2.fastq.gz -l
na12878.rel15.fastq.gz -p na12878Wm -t 20 -g 3000

#NA24385
#upto 500kb
LIBS=500,1000,2000,3000,4000,5000,6000,7000,8000,10000,15000,20000,30000,40000,50000,60000,70000,80000,90000,100000,120000,150000,
180000,200000,250000,300000,350000,400000,450000,500000
#run the WenganD pipeline from the given Discover contigs
perl wengan.pl -x ontlon -M 5000 -P 100000 -a D -s D1_S1S2T_R1.fastq.gz,D1_S1S2T_R2.fastq.gz -l ultra-long-ont.fastq.gz -p
NA24385Wd -t 20 -g 3000 -c 60XNA24385.disco.fa -i ${LIBS}

#HG00733
#upto 80Kb
LIBS=500,1000,2000,3000,4000,5000,6000,7000,8000,10000,15000,20000,30000,40000,50000,60000,70000,80000
#run the WenganD pipeline from the given Discover contigs
perl wengan.pl -x pacraw -a D -M 5000 -s SRR5534475_1.fastq.gz,SRR5534475_2.fastq.gz,SRR5534476_1.fastq.gz,SRR5534476_2.fastq.gz
-l SRR7615963_subreads.fastq.gz -p HG00733Wd -t 20 -g 3000 -c HG00733.ILL250.DISCOVAR.fa -i ${LIBS}

#CHM13
#upto 500kb
LIBS=500,1000,2000,3000,4000,5000,6000,7000,8000,10000,15000,20000,30000,40000,50000,60000,70000,80000,90000,100000,120000,150000,
180000,200000,250000,300000,350000,400000,450000,500000
#run the WenganD pipeline from the given Discover contigs
perl wengan.pl -x ontlon -M 10000 -U 1.75 -R 1.25 -a D -s
SRR3189741_1.fastq.gz,SRR3189741_2.fastq.gz,SRR3189742_1.fastq.gz,SRR3189742_2.fastq.gz -l ont.longest50X.rel3.fastq.gz -p
CHM13Wd -t 44 -g 3000 -c 60XCHM13L.disco.fa -i ${LIBS}

# Hifi + Ultra-long reads (rel3)
HIFI_LIBS=500,1000,2000,3000,4000,5000,6000,7000,8000,10000,12000,15000,18000
#ultra-long libs
LIBS=500,1000,2000,3000,4000,5000,6000,7000,8000,10000,15000,20000,30000,40000,50000,60000,70000,80000,90000,100000,120000,150000,
180000,200000,250000,300000,350000,400000,450000,500000
perl wengan.pl -x ccsont -b HIFI-20kb.fastq.gz -a M -l rel3.longest_50X.fastq.gz -p CHM13.WenganM.Hifi_UL -g 3000 -t 44 -I
${HIFI_LIBS} -i ${LIBS}

```

---

## 1.2.2 WENGAN assemblies of NA12878 at different long-read coverage

The command used for the WENGAN assemblies with MGI+ONT data are shown. Identical commands were used for the WENGAN assemblies from ILL+ONT data.

---

```
# WenganA
#10X
perl wengan.pl -M 1000 -N 2 -x ontraw -a A -s short.reads -l 10X.fastq.gz -p 10X -g 3000 -t 20 2>10X.err > 10X.log
#15X
perl wengan.pl -M 1000 -N 3 -x ontraw -a A -s short.reads -l 15X.fastq.gz -p 15X -g 3000 -t 20 2>15X.err > 15X.log
#20X
perl wengan.pl -M 1000 -N 4 -x ontraw -a A -s short.reads -l 20X.fastq.gz -p 20X -g 3000 -t 20 2>20X.err > 20X.log
#25X
perl wengan.pl -M 1000 -N 5 -x ontraw -a A -s short.reads -l 25X.fastq.gz -p 25X -g 3000 -t 20 2>25X.err > 25X.log
#30X
perl wengan.pl -M 1000 -N 5 -x ontraw -a A -s short.reads -l 30X.fastq.gz -p 30X -g 3000 -t 20 2>30X.err > 30X.log

# WenganD
#10X
perl wengan.pl -N 2 -x ontraw -a D -s short.reads -l 10X.fastq.gz -p 10X -g 3000 -t 44 2>10X.err > 10X.log
#15X
perl wengan.pl -N 3 -x ontraw -a D -s short.reads -l 15X.fastq.gz -p 15X -g 3000 -t 44 2>15X.err > 15X.log
#20X
perl wengan.pl -N 4 -x ontraw -a D -s short.reads -l 20X.fastq.gz -p 20X -g 3000 -t 44 2>20X.err > 20X.log
#25X
perl wengan.pl -N 5 -x ontraw -a D -s short.reads -l 25X.fastq.gz -p 25X -g 3000 -t 44 2>25X.err > 25X.log
#30X
perl wengan.pl -N 5 -x ontraw -a D -s short.reads -l 30X.fastq.gz -p 30X -g 3000 -t 44 2>30X.err > 30X.log

# WenganM
#10X
perl wengan.pl -M 1000 -N 2 -x ontraw -a M -s short.reads -l 10X.fastq.gz -p 10X -g 3000 -t 20 2>10X.err > 10X.log
#15X
perl wengan.pl -M 1000 -N 3 -x ontraw -a M -s short.reads -l 15X.fastq.gz -p 15X -g 3000 -t 20 2>15X.err > 15X.log
#20X
perl wengan.pl -M 1000 -N 4 -x ontraw -a M -s short.reads -l 20X.fastq.gz -p 20X -g 3000 -t 20 2>20X.err > 20X.log
#25X
perl wengan.pl -M 1000 -N 5 -x ontraw -a M -s short.reads -l 25X.fastq.gz -p 25X -g 3000 -t 20 2>25X.err > 25X.log
#30X
perl wengan.pl -M 1000 -N 5 -x ontraw -a M -s short.reads -l 30X.fastq.gz -p 30X -g 3000 -t 20 2>30X.err > 30X.log
```

---

### 1.2.3 WENGAN assemblies of non-human genomes

The command used for the WENGAN assemblies of non-human genomes are shown. All non-human genomes were performed using 20 CPUs.

---

```
# Arabidopsis dataset
#illumina + ONT (MinION)
# WenganM, WenganA, WenganD
perl wengan.pl -x ontraw -a M -s short.reads -l ont.reads -p ara_Wm_or1 -t 20 -g 120
perl wengan.pl -x ontraw -a A -s short.reads -l ont.reads -p ara_Wa_or1 -t 20 -g 120
perl wengan.pl -x ontraw -a D -s short.reads -l ont.reads -p ara_Wd_or1 -t 20 -g 120
# Assembling Illumina + Sequel (PACBIO) read
INS=500,1000,2000,3000,4000,5000,6000,7000,8000,10000,15000,20000,25000,30000
# WenganM, WenganA, WenganD
perl wengan.pl -x pacraw -i ${INS} -a M -s short.reads -l sequel.reads -p ara_Wm_pr1 -t 20 -g 120
perl wengan.pl -x pacraw -i ${INS} -a A -s short.reads -l sequel.reads -p ara_Wa_pr1 -t 20 -g 120
perl wengan.pl -x pacraw -i ${INS} -a D -s short.reads -l sequel.reads -p ara_Wd_pr1 -t 20 -g 120

# Drosophila dataset
# illumina + ONT (MinION)
# WenganM, WenganA, WenganD
perl wengan.pl -x ontraw -a M -M 1000 -d 3 -f 0.5 -s short.reads -l ont.reads -p dro_Wm_or1 -t 20 -g 150
perl wengan.pl -x ontraw -a A -M 1000 -d 3 -s short.reads -l ont.reads -p dro_Wa_or1 -t 20 -g 150
perl wengan.pl -x ontraw -a D -s short.reads -l ont.reads -p dro_Wd_or1 -t 20 -g 150

# Fish dataset
# illumina + ONT (MinION)
# WenganM, WenganA, WenganD
perl wengan.pl -x ontraw -d 4 -M 1000 -T 10000 -a M -s short.reads -l ont.reads -p fish_Wm_or1 -t 20 -g 500
perl wengan.pl -x ontraw -d 4 -a A -s short.reads -l ont.reads -p fish_Wa_or1 -t 20 -g 500
perl wengan.pl -x ontraw -a D -s short.reads -l ont.reads -p fish_Wd_or1 -t 20 -g 500
```

---



## 1.3 FLYE assemblies

### 1.3.1 FLYE assemblies at different long-read coverage

---

```
# Flye v2.5
#10X
flye --nano-raw 10X.fastq.gz -o 10X.flye -t 44 -g 3g
#15X
flye --nano-raw 15X.fastq.gz -o 15X.flye -t 44 -g 3g
#20X
flye --nano-raw 20X.fastq.gz -o 20X.flye -t 44 -g 3g
#25X
flye --nano-raw 25X.fastq.gz -o 25X.flye -t 44 -g 3g
#30X
flye --nano-raw 30X.fastq.gz -o 30X.flye -t 44 -g 3g
```

---

## 2 Polishing FLYE assemblies

### 2.1 Polishing with short and long reads

The Flye assemblies of NA12878 were polished using RACON and NEDIT. In particular, two rounds of long-read polishing with RACON were performed, followed by three rounds of short-read polishing with NEDIT. The commands executed were the following:

---

```
#Polishing of the Flye assembly with 40X Nanopore reads (rel5) and 50X of short illumina reads.
make -f polish.mk PREF=na12878.flye.racon ASM=FLYE.NA12878.fa CPU=44 READS=na12878.rel5.fastq.gz SREADS="AH81VLADXX.R1.fastq.gz
AH81VLADXX.R2.fastq.gz BH88WKADXX.R1.fastq.gz BH88WKADXX.R2.fastq.gz" all
#Polishing of the Flye assembly at 30X coverage with flip-flop called Nanopore reads and Illumina Novaseq short-reads
make -f polish.mk PREF=na12878.flye30x.racon ASM=na12878.flye30X.fa CPU=44 READS=30X.fastq.gz SREADS="S22_L001_R1_001.fastq.gz
S22_L001_R2_001.fastq.gz" all
```

---

## The makefile *polish.mk* contains the following instructions:

---

```
.DELETE_ON_ERROR:
#racon version v1.4.9
RACON=/path/racon
#minimap2 version 2.15-r905
MM=/path/minimap2
# nthits version 0.1.0
NTH=/path/nthits
# ntedit version 1.2.3
NTE=/path/ntedit
TIME=/path/time
#LONG-READ POLISHING
#first round of long-read polishing
$(PREF).r1.paf:
    $(TIME) -v -o $(PREF).r1.mm.time ${MM} -x map-ont -t ${CPU} ${ASM} ${READS} > $@
$(PREF).r1.fa:$(PREF).r1.paf
    $(TIME) -v -o $(PREF).r1.racon.time ${RACON} -u -t ${CPU} ${READS} < ${ASM} > $@ 2> $(PREF).r1.racon.log
#second round of long-read polishing
$(PREF).r2.paf:$(PREF).r1.fa
    $(TIME) -v -o $(PREF).r2.mm.time ${MM} -x map-ont -t ${CPU} < ${READS} > $@
$(PREF).r2.fa:$(PREF).r2.paf
    $(TIME) -v -o $(PREF).r2.racon.time ${RACON} -t ${CPU} ${READS} < $(PREF).r1.fa > $@ 2> $(PREF).r2.racon.log
#SHORT-READ POLISHING
$(PREF).nthits_k60.bf:$(PREF).r2.fa
    echo ${SREADS} | xargs -n 1 > shortreads.txt
    $(TIME) -v -o $(PREF).nthits.K40.time ${NTH} -b 36 -k 40 -t ${CPU} -p $(PREF).nthits --outbloom --solid @shortreads.txt
    $(TIME) -v -o $(PREF).nthits.K50.time ${NTH} -b 36 -k 50 -t ${CPU} -p $(PREF).nthits --outbloom --solid @shortreads.txt
    $(TIME) -v -o $(PREF).nthits.K60.time ${NTH} -b 36 -k 60 -t ${CPU} -p $(PREF).nthits --outbloom --solid @shortreads.txt
# three rounds of short-read polishing with ntEdit after two round of RACON
$(PREF).r2.nt3_edited.fa:$(PREF).r2.fa $(PREF).nthits_k60.bf
    $(TIME) -v -o $(PREF).r2.nt1.time ${NTE} -t ${CPU} -k 60 -i 5 -d 5 -b $(PREF).r2.nt1 -r $(PREF).nthits_k60.bf -f <
    $(TIME) -v -o $(PREF).r2.nt2.time ${NTE} -t ${CPU} -k 50 -i 5 -d 5 -b $(PREF).r2.nt2 -r $(PREF).nthits_k50.bf -f
        $(PREF).r2.nt1_edited.fa
    $(TIME) -v -o $(PREF).r2.nt3.time ${NTE} -t ${CPU} -k 40 -i 5 -d 5 -b $(PREF).r2.nt3 -r $(PREF).nthits_k40.bf -f
        $(PREF).r2.nt2_edited.fa
# all done
all: $(PREF).r2.nt3_edited.fa
```

---

**Supplementary Table 1:** Long read datasets used to evaluate the performance of WENGAN. The ultra-long CHM13 dataset (Rel3) was subsampled to the longest reads covering 50X of the human genome.

|                        | NA12878                     |                         | CHM13                | HG00733             | NA24385             |                            |
|------------------------|-----------------------------|-------------------------|----------------------|---------------------|---------------------|----------------------------|
| Technology             | ONT                         |                         | ONT                  | PacBio/HiFi         | PacBio              | ONT                        |
| Machine                | PromethION                  | MinION                  | MinION               | Sequel II           | Sequel              | MinION                     |
| Read count             | 10,446,475                  | 11,628,512              | 1,253,933            | 5,566,855           | 12,554,013          | 7,762,763                  |
| Min read Size          | 2,000                       | 2,000                   | 66,232               | 2,000               | 2,000               | 2,000                      |
| Max read Size          | 3,323,027                   | 1,019,957               | 6,598,569            | 50,003              | 158,025             | 2,151,856                  |
| N50                    | 17,181                      | 13,643                  | 123,269              | 17,781              | 33,201              | 54,069                     |
| N75                    | 9,645                       | 8,385                   | 88,390               | 15,978              | 20,888              | 24,390                     |
| Coverage               | 35                          | 40                      | 50                   | 33                  | 90                  | 60                         |
| # reads > 100kb        | 1,618                       | 56,283                  | 606,249              | 0                   | 1,176               | 310,435                    |
| Coverage reads > 100kb | 0.10                        | 3.29                    | 32.06                | 0                   | 0.04                | 18.08                      |
| Source                 | PRJNA603060                 | ONT Rel5                | T2T                  | SRR112921[20-23]    | SRR7615963          | GIAB                       |
| URL                    | <a href="#">PRJNA603060</a> | <a href="#">M, P, U</a> | <a href="#">Rel3</a> | <a href="#">SRA</a> | <a href="#">ENA</a> | <a href="#">GIAB:final</a> |

Supplementary Table 2: Short read datasets used to evaluate the performance of WENGAN.

| Sample      | Technology | Machine     | Read count             | File                     | Read length | Coverage | Source/URL  |
|-------------|------------|-------------|------------------------|--------------------------|-------------|----------|-------------|
| NA12878     | Illumina   | HiSeq 2000  | 186,421,465            | SRR891258_1.fastq.gz     | 250         | 59.97    | PRJNA196624 |
|             |            |             | 186,421,465            | SRR891258_2.fastq.gz     |             |          |             |
|             |            |             | 185,398,624            | SRR891259_1.fastq.gz     |             |          |             |
|             |            |             | 185,398,624            | SRR891259_2.fastq.gz     |             |          |             |
|             | Illumina   | HiSeq 2500  | 266,077,618            | AH81VLADXX.R1.fastq.gz   | 150         | 50.22    | GIAB        |
|             |            |             | 266,077,618            | AH81VLADXX.R2.fastq.gz   |             |          |             |
|             |            |             | 252,850,306            | BH88WKADXX.R1.fastq.gz   |             |          |             |
|             |            |             | 252,850,306            | BH88WKADXX.R2.fastq.gz   |             |          |             |
|             | Illumina   | NovaSeq     | 548,283,470            | S22_L001_R1_001.fastq.gz | 150         | 53.06    | PRJNA603060 |
|             |            |             | 548,283,470            | S22_L001_R1_001.fastq.gz |             |          |             |
|             | MGI        | MGISEQ-2000 | 376,183,716            | EBA.bgi.fwd.fastq.gz     | 150         | 36.40    | PRJNA603060 |
|             |            |             | 376,183,716            | EBA.bgi.rev.fastq.gz     |             |          |             |
| 172,099,754 |            |             | V100003043_L01_1.fq.gz | 150                      | 16.65       | GIAB     |             |
| 172,099,754 |            |             | V100003043_L01_2.fq.gz |                          |             |          |             |
| NA24385     | Illumina   | HiSeq 2500  | 441,957,241            | D1_S1S2_R1.fastq.gz      | 250         | 71.28    | GIAB        |
|             |            |             | 441,957,241            | D1_S1S2_R2.fastq.gz      |             |          |             |
| CHM13       | Illumina   | HiSeq 2500  | 202,861,861            | SRR3189742_1.fastq.gz    | 250         | 66.11    | PRJNA269593 |
|             |            |             | 202,861,861            | SRR3189742_2.fastq.gz    |             |          |             |
|             |            |             | 206,992,396            | SRR3189741_1.fastq.gz    |             |          |             |
|             |            |             | 206,992,396            | SRR3189741_2.fastq.gz    |             |          |             |
| HG00733     | Illumina   | HiSeq 2500  | 196,489,884            | SRR5534476_1.fastq.gz    | 250         | 63.26    | PRJNA300840 |
|             |            |             | 196,489,884            | SRR5534476_2.fastq.gz    |             |          |             |
|             |            |             | 195,745,350            | SRR5534475_1.fastq.gz    |             |          |             |
|             |            |             | 195,745,350            | SRR5534475_2.fastq.gz    |             |          |             |
| Total       | -          | -           | 6,462,723,370          | -                        | -           | 416.96   | -           |

**Supplementary Table 3: Public long-read and hybrid assemblies of NA12878 (rel5), HG00733 (sequel and ONT), NA24385 (ONT), and CHM13 (ONT and HiFi) used for benchmarking. All the assemblies were done by the assembler developers.**

| Sample   | Assembler             | Version            | URL                                                                                                              | Accessed   |
|----------|-----------------------|--------------------|------------------------------------------------------------------------------------------------------------------|------------|
| NA12878  | WTDBG2                | 2.3                | <a href="http://NA12878.wt.fa.gz">NA12878.wt.fa.gz</a>                                                           | 27/02/2019 |
|          | MASURCA               | 3.2.8              | <a href="http://MaSuRCA_3.2.8_nanopore.rel5.fa">MaSuRCA_3.2.8_nanopore.rel5.fa</a>                               | 27/02/2019 |
|          | FLYE                  | 2.4                | <a href="http://na12878.ont-ul.35x.fasta.gz">na12878.ont-ul.35x.fasta.gz</a>                                     | 27/03/2019 |
|          | CANU                  | 1.7                | <a href="http://albacore.canu_nanopolish2_pilon2_racon2.fasta">albacore.canu_nanopolish2_pilon2_racon2.fasta</a> | 27/02/2019 |
| HG00733  | FALCON                | Unzip v. July-2018 | <a href="http://RBJD01.fasta.gz">RBJD01.fasta.gz</a>                                                             | 03/05/2019 |
|          | SHASTA                | 0.1                | <a href="http://HG00733_shasta_marginpolish_helen.fa">HG00733_shasta_marginpolish_helen.fa</a>                   | 25/03/2020 |
| NA243875 | SHASTA                | 0.1                | <a href="http://HG002_shasta_marginpolish_helen.fa">HG002_shasta_marginpolish_helen.fa</a>                       | 25/03/2020 |
| CHM13    | SHASTA (ONT-REL3)     | 0.1                | <a href="http://shasta.contigs.rel3.fasta.gz">shasta.contigs.rel3.fasta.gz</a>                                   | 25/03/2020 |
|          | CANU (CURATED)        | 1.7.1              | <a href="http://chm13.draft_v0.7.fasta.gz">chm13.draft_v0.7.fasta.gz</a>                                         | 25/03/2020 |
|          | CANU (ONT-REL3)       | 1.9                | <a href="http://canu.contigs.rel3.fasta.gz">canu.contigs.rel3.fasta.gz</a>                                       | 25/03/2020 |
|          | FLYE (ONT-REL3)       | 2.5                | <a href="http://flye.contigs.rel3.fasta.gz">flye.contigs.rel3.fasta.gz</a>                                       | 25/03/2020 |
|          | CANU (HiFi-20KB)      | hicanu_rc          | <a href="http://chm13_20k_canu_hifi.fasta.gz">chm13_20k_canu_hifi.fasta.gz</a>                                   | 25/03/2020 |
|          | PEREGRINE (HiFi-20KB) | 0.1.5.3            | <a href="http://chm13_20k_peregrine_hifi.fasta.gz">chm13_20k_peregrine_hifi.fasta.gz</a>                         | 25/03/2020 |
|          | HiCANU (HiFi-20KB)    | hicanu_rc          | <a href="http://chm13_20k_hicanu_hifi.fasta.gz">chm13_20k_hicanu_hifi.fasta.gz</a>                               | 25/03/2020 |

**Supplementary Table 4: QUAST validation of the CHM13 assemblies.** NG50 is the contig length such that using longer contigs produces half (50%) of the bases of the reference GRCh38 (3.0882 Gb) genome. NGA50 is NG50 where the lengths of aligned blocks are counted instead of the contig lengths. LG50 is the minimum number of contigs that produce half of the reference length. LGA50 is similar to LG50 but aligned blocks are counted instead. Assembly-errors correspond to the number of positions in the assembled contigs where the left flanking sequence aligns over 1 kbp away from the right flanking sequence on the reference (relocation), or they overlap on more than 1 kbp (relocation), or else the flanking sequences align on different strands (inversion) or different chromosomes (translocation). Genome fraction (%) is the total number of bases aligned of the reference, divided by the reference size. The QUAST (Version: 5.0.2) analysis was run with the options min-identity 80 and fragmented using the autosomes plus X and Y chromosomes of GRCh38 ("quast -r GRCh38.chrom.no.alt.fa -large -min-identity 80 -fragmented"). Additionally, we ran a QUAST analysis using as reference the curated CHM13 Canu assembly (chm13.draft.v0.7, 2.9384 Gb) generated by the T2T consortium. Assembly errors overlapping centromeres or segmental duplications of GRCh38 were discounted. A second QUAST run using a minimum alignment length of 50kb was performed to discount assembly errors overlapping problematic regions (segmental duplications and centromeres) of the curated CHM13 assembly. Assembly errors before and after discounting problematic regions are shown.

| Assembler        | NG50 (Mb)                                  | LG50 | Assembly errors | Unaligned length (Mb) | Genome fraction (%) | Duplication ratio | Indels per 100kb | Largest alignment (Mb) | NGA50 (Mb) | LGA50 | CPU Hours | Max RAM (Gb) | Elapsed time (h:m:s) |
|------------------|--------------------------------------------|------|-----------------|-----------------------|---------------------|-------------------|------------------|------------------------|------------|-------|-----------|--------------|----------------------|
| QUAST Reference  | GRCh38 (Length 3,088,269,832 bp)           |      |                 |                       |                     |                   |                  |                        |            |       |           |              |                      |
| CANU (UL)        | 74.06                                      | 16   | 8,157 / 153     | 64.36                 | 96.804              | 1.029             | 322.97           | 70.9                   | 25.37      | 38    | ~219,000  | 80           | -                    |
| FLYE (UL)        | 69.64                                      | 17   | 4,837 / 106     | 37.85                 | 96.373              | 1.018             | 451.33           | 90.7                   | 26.21      | 37    | ~5,000    | ~871         | -                    |
| SHASTA (UL)      | 47.76                                      | 19   | 649 / 78        | 1.82                  | 95.694              | 1.004             | 150.9            | 90.5                   | 25.87      | 37    | -         | ~2,000       | ~24:00:00            |
| CANU (HiFi)      | 45.63                                      | 20   | 11,680 / 171    | 74.74                 | 97.431              | 1.051             | 33.79            | 71.8                   | 22.39      | 41    | 3,524     | 80           | ~12:00:00            |
| HICANU (HiFi)    | 77.12                                      | 14   | 12,401 / 193    | 83.18                 | 97.446              | 1.120             | 39.66            | 90.5                   | 25.06      | 37    | 5,000     | 119          | ~12:00:00            |
| PEREGRINE (HiFi) | 37.30                                      | 26   | 3,209 / 149     | 23.02                 | 96.205              | 1.018             | 32.72            | 86.7                   | 23.85      | 40    | 58        | 449          | 2:00:00              |
| WENGAN (ILL+UL)  | 69.72                                      | 16   | 1,117 / 105     | 9.79                  | 95.634              | 1.008             | 35.29            | 90.6                   | 23.84      | 41    | 1,198     | 646          | 38:12:30             |
| WENGAN (HiFi+UL) | 70.73                                      | 16   | 1,239 / 110     | 12.90                 | 95.662              | 1.009             | 34.03            | 71.81                  | 26.84      | 37    | 981       | 125          | 85:03:47             |
| QUAST Reference  | chm13.draft.v0.7 (Length 2,938,464,690 bp) |      |                 |                       |                     |                   |                  |                        |            |       |           |              |                      |
| CANU (UL)        | 77.96                                      | 15   | 6,136 / 373     | 31.40                 | 98.392              | 1.027             | 325.97           | 104.4                  | 47.44      | 21    | ~219,000  | ~80          | -                    |
| FLYE (UL)        | 70.32                                      | 16   | 2,139 / 334     | 18.56                 | 97.368              | 1.017             | 446              | 111.8                  | 46.55      | 20    | ~5,000    | ~871         | -                    |
| SHASTA (UL)      | 58.09                                      | 18   | 187 / 60        | 0.39                  | 96.149              | 1.002             | 141.25           | 111.7                  | 44.54      | 20    | -         | ~2,000       | ~24:00:00            |
| CANU (HiFi)      | 46.82                                      | 19   | 5,300 / 652     | 32.86                 | 98.703              | 1.054             | 26.34            | 111.7                  | 34.68      | 25    | 3,524     | 80           | ~12:00:00            |
| HICANU (HiFi)    | 82.40                                      | 13   | 5,773 / 748     | 38.17                 | 98.741              | 1.123             | 32.39            | 111.6                  | 39.12      | 22    | 5,000     | 119          | 12:00:00             |
| PEREGRINE (HiFi) | 38.11                                      | 24   | 1,194 / 188     | 6.80                  | 97.261              | 1.014             | 15.76            | 109.9                  | 31.44      | 27    | 58        | 449          | 2:00:00              |
| WENGAN (ILL+UL)  | 71.25                                      | 15   | 431 / 147       | 3.58                  | 96.321              | 1.005             | 16.86            | 110.6                  | 35.01      | 24    | 1,198     | 646          | 38:12:30             |
| WENGAN (HiFi+UL) | 80.63                                      | 15   | 539 / 140       | 5.62                  | 96.413              | 1.006             | 15.21            | 111.5                  | 46.73      | 20    | 981       | 125          | 85:03:47             |

**Supplementary Table 5:** BAC evaluation using a total of 341 BACs (51,5Mb) of CHM13. "Closed" refers to the number of BACs for which 99.5% of their length aligns to a single locus. The identity and phred-Quality Value (QV) metrics are computed from closed BACs only. The unique closed BACs are BACs located in unique regions of the human genome (30 BACs).

|                  | Closed BACs |       | BAC bases  |       | Closed BACs    |       |              |       | Unique BACs (30) |       |              |       |
|------------------|-------------|-------|------------|-------|----------------|-------|--------------|-------|------------------|-------|--------------|-------|
|                  | #           | %     | length     | %     | Median Quality |       | Mean Quality |       | Median Quality   |       | Mean Quality |       |
|                  |             |       |            |       | %Identity      | QV    | %Identity    | QV    | %Identity        | QV    | %Identity    | QV    |
| SHASTA (UL)      | 176         | 51.61 | 26,926,379 | 52.25 | 99.74          | 25.91 | 99.65        | 24.59 | 99.83            | 27.78 | 99.80        | 27.09 |
| FLYE (UL)        | 253         | 74.19 | 37,970,519 | 73.68 | 99.03          | 20.11 | 98.95        | 19.79 | 99.37            | 21.97 | 99.27        | 21.37 |
| CANU (UL)        | 314         | 92.08 | 47,415,786 | 92.01 | 99.53          | 23.32 | 99.45        | 22.60 | 99.61            | 24.11 | 99.59        | 23.83 |
| PEREGRINE (HiFi) | 136         | 39.88 | 20,114,050 | 39.03 | 99.98          | 37.32 | 99.74        | 25.86 | 100.00           | 44.75 | 99.98        | 37.14 |
| CANU (HiFi)      | 308         | 90.32 | 46,430,951 | 90.10 | 99.99          | 40.56 | 99.95        | 32.62 | 100.00           | 43.82 | 99.98        | 37.17 |
| HICANU (HiFi)    | 326         | 95.60 | 49,196,764 | 95.47 | 99.99          | 40.71 | 99.95        | 33.28 | 100.00           | 43.82 | 99.98        | 37.17 |
| WENGAN (ILL+UL)  | 175         | 51.32 | 26,197,247 | 50.84 | 99.81          | 27.31 | 99.35        | 21.84 | 99.98            | 36.06 | 99.95        | 33.25 |
| WENGAN (HiFi+UL) | 168         | 49.26 | 25,368,837 | 49.22 | 99.89          | 29.84 | 99.52        | 23.19 | 99.99            | 42.88 | 99.97        | 35.87 |

**Supplementary Table 6:** Repeat class analysis of the WENGAN assemblies of CHM13 using as reference the curated T2T-X chromosome. Assembled contigs were aligned to the T2T-X chromosome using MASH version 2.0 (" -r chrX.t2t.fa -f one-to-one -q asm.fa -s 10000 -pi 85"). Anchored contigs (Figure 7) were masked using REPEATMASKER version 4.1.0 (" -species human -gff -xm -dir=asm.rm asm.anchored.fa"). The REPEATMASKER report (\*.tbl) was used to collect the amount of sequence masked by repeat classes in each assembly. The percentages are computed relative to the amount of repeat class sequences masked in the curated T2T-X chromosome (v.07).

|                            | chrX<br>T2T |       | WENGAN<br>(HiFi+UL) |       | WENGAN<br>(ILL+UL) |       | SHASTA<br>(UL) |       | CANU<br>(UL) |       | PEREGRINE<br>(HiFi) |       | HICANU<br>(HiFi) |       |
|----------------------------|-------------|-------|---------------------|-------|--------------------|-------|----------------|-------|--------------|-------|---------------------|-------|------------------|-------|
| Contigs                    | 1           |       | 2                   |       | 4                  |       | 8              |       | 3            |       | 15                  |       | 9                |       |
| Total length (Mb)          | 154.27      |       | 150.90              |       | 150.52             |       | 148.10         |       | 150.88       |       | 141.51              |       | 152.23           |       |
| Bases masked (Mb)          | 102.27      |       | 99.08               |       | 98.88              |       | 97.22          |       | 99.02        |       | 92.68               |       | 101.01           |       |
| Repeat classes             | #           | (Mb)  | %                   | (Mb)  | %                  | (Mb)  | %              | (Mb)  | %            | (Mb)  | %                   | (Mb)  | %                | (Mb)  |
| SINEs                      | 70,660      | 16.41 | 99.76               | 16.37 | 99.55              | 16.34 | 97.17          | 15.95 | 99.60        | 16.35 | 92.13               | 15.12 | 96.49            | 15.84 |
| ALUs                       | 46,503      | 12.44 | 99.72               | 12.41 | 99.47              | 12.37 | 96.67          | 12.03 | 99.52        | 12.38 | 91.05               | 11.33 | 95.44            | 11.87 |
| MIRs                       | 23,571      | 3.87  | 99.89               | 3.87  | 99.77              | 3.86  | 98.77          | 3.83  | 99.88        | 3.87  | 95.50               | 3.70  | 99.80            | 3.87  |
| LINEs                      | 63,846      | 54.75 | 99.92               | 54.71 | 99.60              | 54.53 | 98.77          | 54.08 | 99.67        | 54.57 | 94.26               | 51.61 | 99.68            | 54.57 |
| LINE1                      | 42,219      | 47.31 | 99.91               | 47.27 | 99.56              | 47.10 | 98.81          | 46.75 | 99.69        | 47.16 | 94.12               | 44.53 | 99.64            | 47.14 |
| LINE2                      | 18,782      | 6.37  | 100.01              | 6.37  | 99.81              | 6.36  | 98.38          | 6.27  | 99.54        | 6.34  | 94.84               | 6.04  | 99.93            | 6.37  |
| L3/CR1                     | 2,087       | 0.75  | 99.87               | 0.75  | 100.00             | 0.75  | 99.03          | 0.75  | 99.62        | 0.75  | 96.07               | 0.73  | 99.99            | 0.75  |
| LTR elements               | 30,495      | 18.62 | 99.92               | 18.61 | 99.73              | 18.57 | 98.97          | 18.43 | 99.66        | 18.56 | 92.86               | 17.29 | 98.82            | 18.40 |
| ERVL                       | 6,459       | 3.90  | 100.03              | 3.90  | 99.74              | 3.89  | 99.33          | 3.87  | 99.76        | 3.89  | 92.45               | 3.61  | 99.34            | 3.87  |
| ERV1-MaLRs                 | 14,573      | 7.17  | 99.94               | 7.16  | 99.88              | 7.16  | 98.97          | 7.09  | 99.73        | 7.15  | 94.29               | 6.76  | 98.48            | 7.06  |
| ERV_classI                 | 6,998       | 6.27  | 99.85               | 6.26  | 99.62              | 6.24  | 98.77          | 6.19  | 99.54        | 6.24  | 91.96               | 5.76  | 98.77            | 6.19  |
| ERV_classII                | 468         | 0.49  | 99.97               | 0.49  | 98.73              | 0.49  | 98.42          | 0.49  | 99.61        | 0.49  | 82.49               | 0.41  | 98.77            | 0.49  |
| DNA elements               | 26,013      | 6.31  | 99.87               | 6.31  | 99.87              | 6.31  | 98.86          | 6.24  | 99.56        | 6.29  | 95.78               | 6.05  | 99.46            | 6.28  |
| hAT-Charlie                | 12,551      | 2.58  | 99.88               | 2.58  | 99.78              | 2.58  | 98.73          | 2.55  | 99.69        | 2.58  | 95.85               | 2.48  | 99.47            | 2.57  |
| TcMar-Tigger               | 6,255       | 2.20  | 100.02              | 2.20  | 100.07             | 2.21  | 99.17          | 2.19  | 99.40        | 2.19  | 95.19               | 2.10  | 99.54            | 2.19  |
| Unclassified               | 489         | 0.25  | 100.55              | 0.25  | 99.89              | 0.25  | 97.02          | 0.24  | 98.64        | 0.24  | 91.72               | 0.23  | 99.07            | 0.25  |
| Total interspersed repeats | -           | 96.35 | 99.89               | 96.25 | 99.63              | 95.99 | 98.54          | 94.94 | 99.65        | 96.01 | 93.72               | 90.29 | 98.95            | 95.34 |
| Small RNA                  | 724         | 0.07  | 100.06              | 0.07  | 99.91              | 0.07  | 97.98          | 0.07  | 101.23       | 0.08  | 95.18               | 0.07  | 99.42            | 0.07  |
| Satellites                 | 95          | 3.78  | 18.28               | 0.69  | 18.21              | 0.69  | 6.15           | 0.23  | 24.11        | 0.91  | 13.70               | 0.52  | 98.64            | 3.73  |
| Simple repeats             | 29,163      | 1.80  | 100.26              | 1.80  | 102.90             | 1.85  | 95.95          | 1.72  | 96.57        | 1.73  | 87.04               | 1.56  | 90.89            | 1.63  |
| Low complexity             | 3,718       | 0.26  | 98.32               | 0.25  | 98.64              | 0.25  | 92.50          | 0.24  | 105.59       | 0.27  | 84.22               | 0.22  | 85.51            | 0.22  |

**Supplementary Table 7: Short read assemblies.** The ABYSS2 and MINIA3 assemblies were run using 20 CPUs. The DISCOVAR assemblies were run using 44 CPUs and a high memory machine.

| Sample  | Sequencer            | Assembler | Contigs |     |         | NG50<br>(bp) | NG75<br>(bp) | Size<br>(Mb) | CPU<br>hours | Elapsed<br>time | RAM<br>(Gb) |
|---------|----------------------|-----------|---------|-----|---------|--------------|--------------|--------------|--------------|-----------------|-------------|
|         |                      |           | Total   | Min | Max     |              |              |              |              |                 |             |
| NA12878 | HiSeq 2500 (2x150bp) | MINIA3    | 465,278 | 500 | 160,556 | 9,680        | 3,524        | 2,715        | 77           | 10:00:15        | 16          |
| NA12878 | NovaSeq (2x150bp)    | MINIA3    | 402,298 | 500 | 189,686 | 11,797       | 4,323        | 2,722        | 69           | 8:03:09         | 15          |
| NA12878 | MGISeq (2x150bp)     | MINIA3    | 428,404 | 500 | 192,702 | 10,568       | 3,739        | 2,701        | 73           | 11:01:35        | 21          |
| NA12878 | HiSeq 2500 (2x150bp) | ABYSS2    | 363,092 | 500 | 176,953 | 12,941       | 4,884        | 2,715        | 572          | 32:50:55        | 43          |
| NA12878 | NovaSeq (2x150bp)    | ABYSS2    | 333,295 | 500 | 205,648 | 14,558       | 5,512        | 2,725        | 436          | 24:13:45        | 43          |
| NA12878 | MGISeq (2x150bp)     | ABYSS2    | 430,581 | 500 | 192,271 | 10,789       | 3,638        | 2,682        | 437          | 24:12:22        | 43          |
| NA12878 | HiSeq 2000 (2x250bp) | DISCOVAR  | 145,032 | 500 | 768,671 | 91,438       | 38,345       | 2,863        | 439          | 14:50:28        | 622         |
| NA12878 | NovaSeq (2x150bp)    | DISCOVAR  | 147,907 | 500 | 553,546 | 49,129       | 20,438       | 2,774        | 439          | 17:24:36        | 595         |
| NA12878 | MGISeq (2x150bp)     | DISCOVAR  | 157,838 | 500 | 494,557 | 43,456       | 16,964       | 2,758        | 410          | 17:33:48        | 585         |
| NA24385 | HiSeq 2500 (2x250bp) | DISCOVAR  | 157,761 | 500 | 774,130 | 81,714       | 36,386       | 2,888        | 577          | 21:18:12        | 651         |
| CHM13   | HiSeq 2500 (2x250bp) | DISCOVAR  | 111,955 | 500 | 823,426 | 97,044       | 42,421       | 2,853        | 723          | 23:04:00        | 647         |
| HG00733 | HiSeq 2500 (2x250bp) | DISCOVAR  | 182,375 | 500 | 737,710 | 54,033       | 22,394       | 2,856        | 450          | 17:28:12        | 644         |



**Supplementary Table 8: QUASt validation of the diploid assemblies.** NG50 is the contig length such that using longer contigs produces half (50%) of the bases of the reference GRCh38 (3.0882 Gb) genome. NGA50 is NG50 where the lengths of aligned blocks are counted instead of the contig lengths. LG50 is the minimum number of contigs that produce half of the reference length. LGA50 is similar to LG50 but aligned blocks are counted instead. Assembly-errors correspond to the number of positions in the assembled contigs where the left flanking sequence aligns over 1 kbp away from the right flanking sequence on the reference (relocation), or they overlap on more than 1 kbp (relocation), or else the flanking sequences align on different strands (inversion) or different chromosomes (translocation). Genome fraction (%) is the total number of bases aligned of the reference, divided by the reference size. The QUASt (Version: 5.0.2) analysis was run with the options min-identity 80 and fragmented using the autosomes plus X and Y chromosomes of GRCh38 (“quast -r GRCh38\_chrom\_no\_alt.fa -large -min-identity 80 -fragmented”). Assembly errors overlapping centromeres or segmental duplications of GRCh38 were discounted. Assembly errors before and after discounting problematic regions are shown. The SHASTA assemblies were generated and polished using only Nanopore reads. The total elapsed time for the WENGAND assemblies (using 44 cores) was HG00733(43 hours), NA34285 (43 hours), and NA12878 (23.2 hours). The total elapsed time for the WENGANA and WENGANM assemblies of NA12878 (using 20 cores) was 44.8 and 22.5 hours, respectively.

| Assembler        | NG50       | LG50 | Assembly errors | Unaligned length | Genome fraction (%) | Indels per 100kb | Largest alignment | NGA50      | LGA50 |
|------------------|------------|------|-----------------|------------------|---------------------|------------------|-------------------|------------|-------|
| NA12878 (REL5)   |            |      |                 |                  |                     |                  |                   |            |       |
| WENGANA          | 25,991,829 | 31   | 589 / 91        | 4,759,777        | 94.30               | 90.36            | 75,324,995        | 14,344,805 | 59    |
| WENGAND          | 35,310,335 | 26   | 955 / 158       | 8,625,359        | 95.25               | 53.48            | 72,841,993        | 16,408,877 | 54    |
| WENGANM          | 17,237,782 | 44   | 638 / 153       | 5,211,387        | 94.22               | 102.36           | 45,660,962        | 11,815,416 | 72    |
| MASURCA          | 8,425,533  | 105  | 2,622 / 275     | 24,677,708       | 95.80               | 47.07            | 32,622,531        | 5,692,898  | 149   |
| CANU (Polished)  | 10,410,217 | 79   | 2,346 / 194     | 9,422,362        | 95.05               | 55.39            | 34,067,697        | 7,120,450  | 113   |
| WTDBG2           | 11,842,381 | 62   | 2,074 / 124     | 32,133,988       | 91.70               | 1135.05          | 70,478,230        | 7,380,335  | 98    |
| FLYE             | 22,908,596 | 43   | 3,424 / 177     | 21,286,450       | 95.56               | 1470.67          | 78,988,942        | 12,355,459 | 65    |
| HG00733 (PacBio) |            |      |                 |                  |                     |                  |                   |            |       |
| WENGAND          | 32,350,336 | 29   | 863 / 119       | 6,956,865        | 95.12               | 35.82            | 71,027,756        | 17,305,449 | 51    |
| FALCON           | 22,334,437 | 39   | 2,410 / 198     | 15,414,934       | 96.06               | 62.19            | 71,678,734        | 14,607,765 | 58    |
| SHASTA (UL-ONT)  | 21,707,787 | 40   | 873 / 107       | 6,486,246        | 94.98               | 140.97           | 78,219,729        | 12,986,946 | 59    |
| HG002 (UL-ONT)   |            |      |                 |                  |                     |                  |                   |            |       |
| WENGAND          | 50,594,311 | 18   | 1,434 / 156     | 10,536,361       | 96.36               | 38.78            | 75,562,021        | 24,515,399 | 44    |
| SHASTA           | 20,346,145 | 36   | 962 / 126       | 6,520,569        | 95.61               | 152.17           | 75,647,382        | 14,315,298 | 60    |

Supplementary Table 9: Fosmid / BAC evaluation of the NA12878 (rel5) and HG00733 assemblies. "Closed" refers to the number of Fosmids/BACs for which 99.5% of their length aligns to a single locus. The identity and phred-Quality Value (QV) metrics are computed from closed Fosmids/BACs only. The common closed Fosmids/BACs are the Fosmids/BACs closed by all the evaluated genome assemblies. A total of 103 Fosmids (3.92Mb) and 179 BACs (27.9Mb) were used to determine the consensus quality of NA12878 (75 common Fosmids) and HG00733 (35 common BACs) assemblies, respectively.

|                   | Closed |       | bases      |       | Closed    |       |           |       | Common closed |       |           |       |
|-------------------|--------|-------|------------|-------|-----------|-------|-----------|-------|---------------|-------|-----------|-------|
|                   | #      | %     | length     | %     | %Identity | QV    | %Identity | QV    | %Identity     | QV    | %Identity | QV    |
| NA12878 (Fosmids) |        |       |            |       |           |       |           |       |               |       |           |       |
| WENGAN A          | 96     | 93.20 | 3,681,736  | 93.73 | 99.83     | 27.74 | 99.47     | 22.77 | 99.86         | 28.41 | 99.67     | 24.79 |
| WENGAN D          | 96     | 93.20 | 3,677,764  | 93.63 | 99.92     | 30.91 | 99.66     | 24.70 | 99.92         | 31.02 | 99.82     | 27.55 |
| WENGAN M          | 94     | 91.26 | 3,592,857  | 91.47 | 99.80     | 27.07 | 99.42     | 22.35 | 99.84         | 27.84 | 99.54     | 23.38 |
| MASURCA           | 100    | 97.09 | 3,819,651  | 97.24 | 99.80     | 26.91 | 99.69     | 25.03 | 99.81         | 27.10 | 99.74     | 25.84 |
| CANU (Polished)   | 94     | 91.26 | 3,584,995  | 91.27 | 99.74     | 25.88 | 99.28     | 21.45 | 99.87         | 28.79 | 99.52     | 23.21 |
| FLYE              | 95     | 92.23 | 3,632,548  | 92.48 | 97.73     | 16.43 | 97.61     | 16.21 | 97.71         | 16.41 | 97.62     | 16.24 |
| WTDBG2            | 84     | 81.55 | 3,199,569  | 81.45 | 98.06     | 17.13 | 97.93     | 16.83 | 98.04         | 17.08 | 97.95     | 16.89 |
| HG00733 (BACs)    |        |       |            |       |           |       |           |       |               |       |           |       |
| WENGAN D          | 51     | 28.49 | 8,112,378  | 29.01 | 99.74     | 25.78 | 99.14     | 20.64 | 99.77         | 26.42 | 99.02     | 20.09 |
| FALCON            | 80     | 44.69 | 12,313,738 | 44.04 | 99.80     | 26.89 | 99.34     | 21.80 | 99.81         | 27.30 | 99.27     | 21.34 |
| SHASTA (Polished) | 41     | 22.91 | 6,550,460  | 23.43 | 99.53     | 23.32 | 98.87     | 19.47 | 99.54         | 23.36 | 98.87     | 19.47 |

Supplementary Table 10: Polishing the FLYE assembly of NA12878 with short (HiSeq 2500) and long (ONT rel5) reads. The FLYE assembly was polished using two rounds of long-read polishing with RACON followed by three rounds of short-read polishing with NTEDIT. The short-read polishing was done using the same short-reads used in the WENGAN assemblies (50X of pair-end 2x150bp reads). Consensus quality statistics after each round of polishing are presented.

|                  |           | FLYE      | FLYE+<br>RACON X 1 | FLYE+<br>RACON X 2 | FLYE+<br>RACON X 2+<br>NTEDIT X 3 |           |
|------------------|-----------|-----------|--------------------|--------------------|-----------------------------------|-----------|
| T. length (Mb)   |           | 2,880.84  | 2,847.89           | 2,846.09           | 2,850.65                          |           |
| Aln. length (Mb) |           | 2,722.89  | 2,745.81           | 2,750.02           | 2,750.98                          |           |
| bases < 99% (Mb) |           | 157.96    | 102.08             | 96.07              | 99.66                             |           |
| Indels           | short     | Number    | 36,649,717         | 12,397,212         | 12,022,856                        | 2,568,960 |
|                  | [1-2]     | Rate (bp) | 74                 | 221                | 229                               | 1,071     |
|                  | medium    | Number    | 2,381,191          | 1,279,399          | 1,168,244                         | 720,564   |
|                  | [3,50]    | Rate (bp) | 1,143              | 2,146              | 2,354                             | 3,818     |
|                  | large     | Number    | 13,840             | 14,544             | 14,707                            | 14,903    |
|                  | >50       | Rate (bp) | 196,740            | 188,793            | 186,987                           | 184,593   |
| Fosmid median QV |           | 16.42     | 19.95              | 20.23              | 23.49                             |           |
| BUSCO            | #Genes    | 2268      | -                  | -                  | 3680                              |           |
|                  | %Complete | 55.3      | -                  | -                  | 89.7                              |           |
| Computational    | CPU       | -         | 132                | 250                | 755                               |           |
| Resources        | RAM       | -         | 386                | 386                | 386                               |           |

Supplementary Table 11: Long-read coverage tritiation of the PromethION data of NA12878 for de novo assembly.

| # reads   | Min   | Max       | N50    | N75    | Bases (Mb) | Coverage |
|-----------|-------|-----------|--------|--------|------------|----------|
| 1,878,641 | 5,000 | 2,914,544 | 19,575 | 12,724 | 30,000     | 10X      |
| 2,817,267 | 5,000 | 2,914,544 | 19,578 | 12,728 | 45,000     | 15X      |
| 3,755,076 | 5,000 | 2,914,544 | 19,590 | 12,730 | 60,000     | 20X      |
| 4,694,725 | 5,000 | 3,323,027 | 19,590 | 12,729 | 75,000     | 25X      |
| 5,633,658 | 5,000 | 3,323,027 | 19,589 | 12,729 | 90,000     | 30X      |

**Supplementary Table 12: WENGAN and FLYE (v.2.5) assemblies of NA12878 at different long-read coverage.** The WENGAND and FLYE assemblies were run using 44 CPUs on a high memory machine (750Gb RAM). WENGANA and WENGANM were run using 20 CPUs. Assembly errors overlapping centromeres or segmental duplications of GRCh38 were discounted. Assembly errors before and after discounting problematic regions are shown.

| Assembler | tech | depth | length<br>(Gb) | %R.cov | NG50<br>(Mb) | NGA50<br>(Mb) | Assembly<br>errors | indels       |           |                      |        |       |                | Busco<br>%<br>complete | CPU<br>hours | Max<br>RAM<br>(Gb) | elapsed<br>time<br>h:m:s |            |
|-----------|------|-------|----------------|--------|--------------|---------------|--------------------|--------------|-----------|----------------------|--------|-------|----------------|------------------------|--------------|--------------------|--------------------------|------------|
|           |      |       |                |        |              |               |                    | per<br>100kb | short (M) | number<br>medium (M) | large  | short | rate<br>medium |                        |              |                    |                          | large (kb) |
| WENGANA   | MGI  | 10    | 2.759          | 93.78  | 2.93         | 2.71          | 601 / 117          | 109.83       | 2.285     | 0.496                | 17.677 | 1,199 | 5,524          | 155,048                | 93.59        | 494                | 43                       | 28:44:13   |
| WENGANA   | MGI  | 15    | 2.765          | 93.94  | 8.26         | 6.74          | 629 / 95           | 90.32        | 1.943     | 0.426                | 17.421 | 1,416 | 6,459          | 157,867                | 94.23        | 515                | 43                       | 29:53:20   |
| WENGANA   | MGI  | 20    | 2.767          | 94.02  | 11.94        | 8.69          | 641 / 95           | 80.34        | 1.728     | 0.396                | 17.328 | 1,593 | 6,959          | 158,863                | 94.47        | 535                | 43                       | 31:07:09   |
| WENGANA   | MGI  | 25    | 2.769          | 94.06  | 14.53        | 10.48         | 660 / 108          | 74.69        | 1.603     | 0.379                | 17.398 | 1,719 | 7,276          | 158,369                | 94.66        | 554                | 43                       | 32:09:12   |
| WENGANA   | MGI  | 30    | 2.770          | 94.10  | 15.55        | 10.37         | 679 / 108          | 71.56        | 1.530     | 0.370                | 17.477 | 1,802 | 7,452          | 157,737                | 94.62        | 558                | 43                       | 32:22:13   |
| WENGANA   | ILL  | 10    | 2.768          | 93.98  | 3.73         | 3.25          | 653 / 104          | 82.28        | 1.633     | 0.436                | 18.294 | 1,681 | 6,306          | 150,109                | 94.52        | 492                | 43                       | 28:21:55   |
| WENGANA   | ILL  | 15    | 2.772          | 94.10  | 10.50        | 7.79          | 674 / 100          | 68.93        | 1.405     | 0.390                | 17.999 | 1,961 | 7,068          | 153,004                | 94.79        | 512                | 43                       | 29:31:23   |
| WENGANA   | ILL  | 20    | 2.775          | 94.15  | 14.19        | 10.32         | 682 / 106          | 62.2         | 1.266     | 0.370                | 17.947 | 2,179 | 7,447          | 153,666                | 94.74        | 530                | 43                       | 30:46:28   |
| WENGANA   | ILL  | 25    | 2.776          | 94.18  | 16.03        | 11.82         | 670 / 107          | 58.5         | 1.184     | 0.360                | 18.018 | 2,330 | 7,671          | 153,098                | 94.71        | 548                | 43                       | 31:41:01   |
| WENGANA   | ILL  | 30    | 2.777          | 94.20  | 16.65        | 11.09         | 687 / 108          | 56.29        | 1.134     | 0.354                | 18.023 | 2,434 | 7,802          | 153,157                | 94.76        | 551                | 43                       | 31:51:39   |
| WENGAND   | MGI  | 10    | 2.792          | 94.70  | 6.97         | 5.93          | 759 / 114          | 67.82        | 1.352     | 0.349                | 17.619 | 2,046 | 7,919          | 157,012                | 94.88        | 463                | 585                      | 20:56:56   |
| WENGAND   | MGI  | 15    | 2.795          | 94.79  | 15.56        | 11.35         | 811 / 113          | 58.54        | 1.199     | 0.315                | 17.480 | 2,313 | 8,818          | 158,665                | 94.98        | 480                | 585                      | 21:55:14   |
| WENGAND   | MGI  | 20    | 2.797          | 94.84  | 16.68        | 12.28         | 822 / 120          | 53.27        | 1.086     | 0.298                | 17.439 | 2,555 | 9,310          | 159,113                | 95.00        | 497                | 585                      | 22:52:34   |
| WENGAND   | MGI  | 25    | 2.798          | 94.87  | 17.85        | 12.92         | 823 / 123          | 50.22        | 1.020     | 0.291                | 17.432 | 2,722 | 9,539          | 159,227                | 95.13        | 514                | 585                      | 23:46:22   |
| WENGAND   | MGI  | 30    | 2.799          | 94.90  | 18.77        | 12.70         | 794 / 126          | 48.74        | 0.985     | 0.288                | 17.455 | 2,822 | 9,649          | 159,191                | 95.05        | 516                | 585                      | 23:46:25   |
| WENGAND   | ILL  | 10    | 2.797          | 94.78  | 8.43         | 6.58          | 770 / 143          | 62.58        | 1.233     | 0.334                | 18.550 | 2,246 | 8,281          | 149,287                | 94.86        | 490                | 595                      | 20:40:36   |
| WENGAND   | ILL  | 15    | 2.800          | 94.87  | 16.48        | 12.07         | 798 / 123          | 54.22        | 1.094     | 0.305                | 18.482 | 2,537 | 9,086          | 150,167                | 94.96        | 506                | 595                      | 21:34:51   |
| WENGAND   | ILL  | 20    | 2.802          | 94.92  | 18.28        | 13.17         | 837 / 129          | 49.6         | 0.999     | 0.292                | 18.474 | 2,783 | 9,515          | 150,425                | 94.88        | 524                | 595                      | 22:35:25   |
| WENGAND   | ILL  | 25    | 2.803          | 94.95  | 19.40        | 13.88         | 897 / 119          | 46.83        | 0.936     | 0.285                | 18.431 | 2,967 | 9,760          | 150,759                | 94.83        | 540                | 595                      | 23:27:02   |
| WENGAND   | ILL  | 30    | 2.804          | 94.97  | 21.62        | 14.27         | 903 / 118          | 45.51        | 0.904     | 0.281                | 18.546 | 3,076 | 9,888          | 149,913                | 94.76        | 543                | 595                      | 23:31:51   |
| WENGANM   | MGI  | 10    | 2.777          | 94.26  | 2.59         | 2.42          | 726 / 140          | 93.97        | 1.946     | 0.445                | 18,123 | 1,415 | 6,191          | 151,937                | 94.40        | 126                | 37                       | 14:22:18   |
| WENGANM   | MGI  | 15    | 2.782          | 94.41  | 7.46         | 6.13          | 717 / 115          | 78.24        | 1.662     | 0.386                | 17.765 | 1,662 | 7,156          | 155,537                | 94.93        | 138                | 37                       | 15:06:20   |
| WENGANM   | MGI  | 20    | 2.784          | 94.47  | 10.24        | 7.75          | 768 / 131          | 70.1         | 1.489     | 0.360                | 17,723 | 1,858 | 7,677          | 156,058                | 94.91        | 158                | 37                       | 16:19:06   |
| WENGANM   | MGI  | 25    | 2.786          | 94.50  | 11.35        | 8.68          | 779 / 137          | 65.72        | 1.390     | 0.348                | 17,658 | 1,992 | 7,961          | 156,804                | 94.79        | 176                | 38                       | 17:23:14   |
| WENGANM   | MGI  | 30    | 2.787          | 94.53  | 12.39        | 9.61          | 795 / 132          | 63.22        | 1.331     | 0.340                | 17,602 | 2,082 | 8,136          | 157,368                | 94.93        | 187                | 44                       | 18:10:30   |
| WENGANM   | ILL  | 10    | 2.779          | 94.32  | 2.92         | 2.66          | 737 / 151          | 83.61        | 1.692     | 0.433                | 18,121 | 1,630 | 6,364          | 152,187                | 94.54        | 120                | 37                       | 11:18:20   |
| WENGANM   | ILL  | 15    | 2.785          | 94.44  | 7.60         | 5.72          | 762 / 129          | 70.43        | 1.452     | 0.382                | 17,836 | 1,902 | 7,232          | 154,877                | 94.86        | 137                | 37                       | 12:21:11   |
| WENGANM   | ILL  | 20    | 2.787          | 94.49  | 11.14        | 7.39          | 750 / 118          | 63.65        | 1.303     | 0.361                | 17,706 | 2,122 | 7,655          | 156,174                | 94.91        | 152                | 37                       | 13:24:43   |
| WENGANM   | ILL  | 25    | 2.788          | 94.53  | 11.68        | 8.23          | 758 / 130          | 59.88        | 1.219     | 0.351                | 17,617 | 2,271 | 7,891          | 157,065                | 94.91        | 166                | 37                       | 14:18:14   |
| WENGANM   | ILL  | 30    | 2.790          | 94.56  | 11.99        | 8.44          | 810 / 133          | 57.93        | 1.172     | 0.345                | 17,779 | 2,361 | 8,024          | 155,616                | 94.66        | 170                | 42                       | 14:23:24   |
| FLYE      | ONT  | 10    | 2.834          | 94.29  | 0.65         | 0.63          | 1,768 / 477        | 938.11       | 22.375    | 1.547                | 17,367 | 122   | 1,764          | 157,179                | 56.70        | 281                | 270                      | 10:15:20   |
| FLYE      | ONT  | 15    | 2.822          | 94.90  | 3.83         | 3.50          | 1,644 / 177        | 560.36       | 14.035    | 1.077                | 17,680 | 197   | 2,568          | 156,518                | 70.88        | 370                | 334                      | 14:01:46   |
| FLYE      | ONT  | 20    | 2.820          | 94.96  | 13.35        | 10.16         | 1,887 / 139        | 425.2        | 10.610    | 0.976                | 17,856 | 261   | 2,843          | 155,358                | 76.63        | 482                | 398                      | 16:15:15   |
| FLYE      | ONT  | 25    | 2.828          | 95.07  | 16.19        | 13.06         | 2,459 / 136        | 363.11       | 8.943     | 0.942                | 17,675 | 310   | 2,945          | 156,984                | 80.21        | 615                | 467                      | 21:04:14   |
| FLYE      | ONT  | 30    | 2.830          | 95.10  | 16.89        | 13.22         | 2,591 / 128        | 328.29       | 7.995     | 0.929                | 17,852 | 347   | 2,990          | 155,540                | 82.19        | 738                | 531                      | 22:00:03   |

Supplementary Table 13: Fosmid evaluation using a total of 103 Fosmids (3.92Mb) of NA12878. "Closed" refers to the number of Fosmids for which 99.5% of their length aligns to a single locus. The identity and phred-Quality Value (QV) metrics are computed from closed Fosmids only. The common closed Fosmids are the Fosmids closed by all the evaluated genome assemblies (86 Fosmids).

| Assembler | Tech | LRC | Closed Fosmid |       | Fosmid bases |       | Closed Fosmid  |       |              |       | Common closed Fosmid (86) |       |              |       |
|-----------|------|-----|---------------|-------|--------------|-------|----------------|-------|--------------|-------|---------------------------|-------|--------------|-------|
|           |      |     | #             | %     | length       | %     | Median Quality |       | Mean Quality |       | Median Quality            |       | Mean Quality |       |
|           |      |     |               |       |              |       | %Identity      | QV    | %Identity    | QV    | %Identity                 | QV    | %Identity    | QV    |
| WENGANA   | MGI  | 10  | 89            | 86.41 | 3,410,705    | 86.83 | 99.77          | 26.34 | 99.58        | 23.76 | 99.77                     | 26.47 | 99.59        | 23.92 |
| WENGANA   | MGI  | 15  | 94            | 91.26 | 3,600,050    | 91.65 | 99.82          | 27.44 | 99.39        | 22.15 | 99.83                     | 27.63 | 99.65        | 24.56 |
| WENGANA   | MGI  | 20  | 94            | 91.26 | 3,599,919    | 91.65 | 99.83          | 27.64 | 99.68        | 24.89 | 99.84                     | 27.92 | 99.67        | 24.83 |
| WENGANA   | MGI  | 25  | 95            | 92.23 | 3,636,440    | 92.58 | 99.83          | 27.76 | 99.71        | 25.35 | 99.83                     | 27.82 | 99.72        | 25.46 |
| WENGANA   | MGI  | 30  | 95            | 92.23 | 3,636,440    | 92.58 | 99.83          | 27.80 | 99.72        | 25.46 | 99.84                     | 28.02 | 99.72        | 25.53 |
| WENGANA   | ILL  | 10  | 94            | 91.26 | 3,590,963    | 91.42 | 99.86          | 28.50 | 99.69        | 25.10 | 99.87                     | 28.93 | 99.74        | 25.86 |
| WENGANA   | ILL  | 15  | 95            | 92.23 | 3,634,145    | 92.52 | 99.87          | 28.88 | 99.75        | 26.02 | 99.88                     | 29.25 | 99.76        | 26.20 |
| WENGANA   | ILL  | 20  | 96            | 93.20 | 3,670,535    | 93.44 | 99.88          | 29.10 | 99.76        | 26.28 | 99.89                     | 29.46 | 99.77        | 26.36 |
| WENGANA   | ILL  | 25  | 96            | 93.20 | 3,670,535    | 93.44 | 99.87          | 28.92 | 99.78        | 26.49 | 99.88                     | 29.37 | 99.78        | 26.56 |
| WENGANA   | ILL  | 30  | 96            | 93.20 | 3,670,535    | 93.44 | 99.88          | 29.10 | 99.76        | 26.27 | 99.89                     | 29.75 | 99.77        | 26.31 |
| WENGAND   | MGI  | 10  | 96            | 93.20 | 3,670,535    | 93.44 | 99.89          | 29.70 | 99.77        | 26.29 | 99.90                     | 29.91 | 99.78        | 26.58 |
| WENGAND   | MGI  | 15  | 96            | 93.20 | 3,670,535    | 93.44 | 99.90          | 29.88 | 99.77        | 26.44 | 99.90                     | 29.92 | 99.78        | 26.54 |
| WENGAND   | MGI  | 20  | 96            | 93.20 | 3,670,535    | 93.44 | 99.90          | 29.92 | 99.79        | 26.70 | 99.90                     | 30.14 | 99.79        | 26.74 |
| WENGAND   | MGI  | 25  | 96            | 93.20 | 3,670,535    | 93.44 | 99.90          | 29.90 | 99.79        | 26.76 | 99.90                     | 30.04 | 99.79        | 26.76 |
| WENGAND   | MGI  | 30  | 96            | 93.20 | 3,670,535    | 93.44 | 99.90          | 30.07 | 99.79        | 26.82 | 99.91                     | 30.25 | 99.79        | 26.84 |
| WENGAND   | ILL  | 10  | 96            | 93.20 | 3,682,021    | 93.74 | 99.89          | 29.63 | 99.72        | 25.60 | 99.90                     | 30.17 | 99.77        | 26.31 |
| WENGAND   | ILL  | 15  | 97            | 94.17 | 3,712,392    | 94.51 | 99.90          | 30.20 | 99.75        | 26.03 | 99.91                     | 30.69 | 99.77        | 26.44 |
| WENGAND   | ILL  | 20  | 97            | 94.17 | 3,712,392    | 94.51 | 99.91          | 30.62 | 99.76        | 26.24 | 99.92                     | 31.03 | 99.78        | 26.49 |
| WENGAND   | ILL  | 25  | 97            | 94.17 | 3,712,392    | 94.51 | 99.90          | 30.16 | 99.78        | 26.51 | 99.91                     | 30.63 | 99.79        | 26.69 |
| WENGAND   | ILL  | 30  | 96            | 93.20 | 3,670,535    | 93.44 | 99.91          | 30.63 | 99.79        | 26.87 | 99.92                     | 30.76 | 99.80        | 26.91 |
| WENGANM   | MGI  | 10  | 93            | 90.29 | 3,557,496    | 90.57 | 99.84          | 27.90 | 99.62        | 24.15 | 99.86                     | 28.42 | 99.65        | 24.56 |
| WENGANM   | MGI  | 15  | 96            | 93.20 | 3,670,535    | 93.44 | 99.85          | 28.21 | 99.63        | 24.37 | 99.86                     | 28.67 | 99.65        | 24.51 |
| WENGANM   | MGI  | 20  | 96            | 93.20 | 3,670,535    | 93.44 | 99.86          | 28.46 | 99.68        | 24.94 | 99.87                     | 29.02 | 99.68        | 24.89 |
| WENGANM   | MGI  | 25  | 96            | 93.20 | 3,670,535    | 93.44 | 99.88          | 29.13 | 99.72        | 25.52 | 99.88                     | 29.29 | 99.72        | 25.50 |
| WENGANM   | MGI  | 30  | 96            | 93.20 | 3,670,535    | 93.44 | 99.88          | 29.12 | 99.73        | 25.65 | 99.89                     | 29.67 | 99.72        | 25.58 |
| WENGANM   | ILL  | 10  | 93            | 90.29 | 3,551,799    | 90.42 | 99.87          | 28.72 | 99.73        | 25.71 | 99.87                     | 29.02 | 99.74        | 25.87 |
| WENGANM   | ILL  | 15  | 94            | 91.26 | 3,594,981    | 91.52 | 99.88          | 29.20 | 99.75        | 26.00 | 99.88                     | 29.32 | 99.75        | 26.08 |
| WENGANM   | ILL  | 20  | 95            | 92.23 | 3,631,371    | 92.45 | 99.87          | 28.85 | 99.77        | 26.29 | 99.89                     | 29.48 | 99.77        | 26.40 |
| WENGANM   | ILL  | 25  | 95            | 92.23 | 3,631,371    | 92.45 | 99.88          | 29.15 | 99.77        | 26.43 | 99.89                     | 29.40 | 99.78        | 26.54 |
| WENGANM   | ILL  | 30  | 95            | 92.23 | 3,631,371    | 92.45 | 99.88          | 29.07 | 99.77        | 26.43 | 99.88                     | 29.30 | 99.78        | 26.52 |
| FLYE      | ONT  | 10  | 91            | 88.35 | 3,483,942    | 88.69 | 98.26          | 17.60 | 98.04        | 17.07 | 98.27                     | 17.63 | 98.09        | 17.18 |
| FLYE      | ONT  | 15  | 96            | 93.20 | 3,676,002    | 93.58 | 98.80          | 19.19 | 98.71        | 18.88 | 98.80                     | 19.20 | 98.73        | 18.96 |
| FLYE      | ONT  | 20  | 98            | 95.15 | 3,752,655    | 95.54 | 99.05          | 20.22 | 98.91        | 19.62 | 99.06                     | 20.28 | 98.94        | 19.74 |
| FLYE      | ONT  | 25  | 96            | 93.20 | 3,670,535    | 93.44 | 99.14          | 20.67 | 99.03        | 20.12 | 99.16                     | 20.78 | 99.05        | 20.20 |
| FLYE      | ONT  | 30  | 98            | 95.15 | 3,752,655    | 95.54 | 99.20          | 20.94 | 99.09        | 20.39 | 99.22                     | 21.08 | 99.11        | 20.53 |

Supplementary Table 14: Polishing the FLYE assembly of NA12878 with short (NovaSeq) and long (ONT flipflop) reads. The FLYE assembly was polished using two rounds of long-read polishing with RACON followed by three rounds of short-read polishing with NTEDIT. The short-read polishing was done using the same short-reads used in the WENGAN assemblies (NovaSeq 53X of pair-end 2x150bp reads). Consensus quality statistics after each round of polishing are presented.

|                  |           | FLYE      | FLYE+<br>RACON X 1 | FLYE+<br>RACON X 2 | FLYE+<br>RACON X 2+<br>NTEDIT X 3 |           |
|------------------|-----------|-----------|--------------------|--------------------|-----------------------------------|-----------|
| T. length (Mb)   |           | 2,814.05  | 2,806.45           | 2,806.03           | 2,817.79                          |           |
| Aln. length (Mb) |           | 2,772.60  | 2,768.34           | 2,767.77           | 2,768.09                          |           |
| bases < 99% (Mb) |           | 41.44     | 38.11              | 38.26              | 49.70                             |           |
| Indels           | short     | Number    | 7,969,035          | 11,870,633         | 12,091,389                        | 1,908,590 |
|                  | [1-2]     | Rate (bp) | 348                | 233                | 229                               | 1,450     |
|                  | medium    | Number    | 925,062            | 777,251            | 776,941                           | 429,712   |
|                  | [3,50)    | Rate (bp) | 2,997              | 3,562              | 3,562                             | 6,442     |
|                  | large     | Number    | 17,395             | 17,127             | 17,132                            | 17,180    |
|                  | >50       | Rate (bp) | 159,391            | 161,636            | 161,556                           | 161,123   |
| Fosmid median QV |           | 21.08     | 21.68              | 21.62              | 27.21                             |           |
| Busco            | #Genes    | 3,373     | -                  | -                  | 3,840                             |           |
|                  | %Complete | 82.19     | -                  | -                  | 93.56                             |           |
| Computational    | CPU (h)   | -         | 67                 | 134                | 368                               |           |
| Resources        | RAM (Gb)  | -         | 270                | 270                | 270                               |           |

**Supplementary Table 15:** WENGAN assemblies of non-human genomes. L50 and L90 metrics are the minimum number of contigs needed to cover 50% and 90% of the genome assembly, respectively. The BUSCO analysis was performed using as database *embryophyta* (1,440 groups), *diptera* (2,799 groups), and *actinopterygii* (4,584 groups) for assessing WENGAN assemblies of *Arabidopsis thaliana*, *Drosophila mojavensis*, and *Thamnaconus septentrionalis*, respectively. The BUSCO complete genes are reported. All WENGAN assemblies were run using 20 CPUs.

|                                           | Total length<br>(bp) | Number | Longest<br>(bp) | N50<br>(bp) | L50 | N90<br>(bp) | L90 | BUSCO<br>complete<br>(%) | CPU<br>(h) | RAM<br>(Gb) | Elapsed<br>h:m:s |
|-------------------------------------------|----------------------|--------|-----------------|-------------|-----|-------------|-----|--------------------------|------------|-------------|------------------|
| <i>Arabidopsis thaliana</i> (Plant)       |                      |        |                 |             |     |             |     |                          |            |             |                  |
| WENGANA (ONT)                             | 117,506,078          | 132    | 12,970,918      | 9,090,558   | 6   | 1,175,083   | 18  | 98.2                     | 30         | 24          | 1:37:16          |
| WENGANA (PAC)                             | 118,529,634          | 62     | 16,182,978      | 12,781,507  | 5   | 1,722,142   | 10  | 98.1                     | 34         | 24          | 1:49:35          |
| WENGAND (ONT)                             | 118,716,946          | 127    | 14,075,903      | 9,426,751   | 5   | 1,182,659   | 18  | 98.2                     | 16         | 125         | 1:08:40          |
| WENGAND (PAC)                             | 119,426,674          | 82     | 16,200,101      | 12,773,488  | 5   | 1,704,574   | 13  | 98.3                     | 19         | 125         | 1:19:09          |
| WENGANM (ONT)                             | 116,741,168          | 158    | 14,409,767      | 9,394,408   | 5   | 677,048     | 20  | 98.3                     | 6          | 7           | 0:32:05          |
| WENGANM (PAC)                             | 117,786,141          | 95     | 14,435,119      | 9,400,311   | 5   | 1,443,075   | 18  | 98.3                     | 8          | 7           | 0:38:08          |
| <i>Drosophila mojavensis</i> (Insect)     |                      |        |                 |             |     |             |     |                          |            |             |                  |
| WENGANA (ONT)                             | 151,700,204          | 264    | 28,214,474      | 11,881,786  | 4   | 302,618     | 49  | 97.4                     | 35         | 24          | 2:00:00          |
| WENGAND (ONT)                             | 154,707,097          | 137    | 26,452,207      | 25,667,050  | 3   | 2,495,673   | 8   | 98.3                     | 33         | 139         | 2:04:18          |
| WENGANM (ONT)                             | 154,260,731          | 214    | 20,472,051      | 11,882,057  | 5   | 1,519,782   | 18  | 98.3                     | 18         | 7           | 1:20:26          |
| <i>Thamnaconus septentrionalis</i> (Fish) |                      |        |                 |             |     |             |     |                          |            |             |                  |
| WENGANA (ONT)                             | 471,216,505          | 204    | 31,551,066      | 15,775,403  | 12  | 1,976,564   | 41  | 95.0                     | 96         | 45          | 5:50:10          |
| WENGAND (ONT)                             | 476,028,467          | 218    | 21,865,951      | 14,362,854  | 13  | 2,824,309   | 36  | 95.8                     | 288        | 148         | 17:13:59         |
| WENGANM (ONT)                             | 476,651,601          | 487    | 21,993,416      | 14,251,541  | 13  | 1,952,617   | 44  | 94.8                     | 57         | 32          | 7:07:14          |

**Supplementary Table 16:** BAC and Fosmid sequences used to assess the consensus accuracy of genome assemblies. The sequences of NA12878 were obtained by randomly selecting 103 clones from a NA12878 Fosmid library. The BAC sequences of HG0073 and CHM13 were obtained from a BAC library enriched in segmental duplications.

| Sample   | Sequences                    | Type   | Total | Length (Mb) |
|----------|------------------------------|--------|-------|-------------|
| NA128978 | NA12878_clones.ver_1.0.fasta | Fosmid | 103   | 3.92        |
| HG0073   | HG0073-BACs.fasta            | BAC    | 179   | 27.96       |
| CHM13    | CHM13-BACs.fasta             | BAC    | 341   | 51.53       |

Supplementary Table 17: Short and long reads datasets of non-human genomes. Public genomic data from a plant (*Arabidopsis thaliana*), an insect (*Drosophila mojavensis*), and a fish (*Thamnaconus septentrionalis*) were collected and assembled using the three WENGAN modes.

|                                    | Technology | Read count  | Coverage | Pairs / N50 | Platform    | SRA / ENA   |
|------------------------------------|------------|-------------|----------|-------------|-------------|-------------|
| <i>Arabidopsis thaliana</i>        | Illumina   | 33,683,902  | 70X      | 2x250 bp    | MiSeq       | ERR2173372  |
|                                    | ONT        | 297,234     | 30X      | 20,132      | MinION      | ERR2173373  |
|                                    | PacBio     | 573,444     | 60X      | 20,031      | Sequel I    | ERR2173371  |
| <i>Drosophila mojavensis</i>       | Illumina   | 82,467,984  | 80X      | 2x151 bp    | NextSeq 500 | SRR6425997  |
|                                    | ONT        | 1,315,872   | 50X      | 10,605      | MinION      | SRR7167955  |
| <i>Thamnaconus septentrionalis</i> | Illumina   | 306,820,704 | 95X      | 2x150 bp    | HiSeq X Ten | SRR10134766 |
|                                    | ONT        | 19,342,211  | 176X     | 10,567      | PromethION  | SRR10150407 |



| Genomic Location                                 | Query name | Query start | Query end | Length                           | Score   | E-val   | %ID                               |
|--------------------------------------------------|------------|-------------|-----------|----------------------------------|---------|---------|-----------------------------------|
| <a href="#">8:121868733-121879155 [Sequence]</a> | 10072      | 1           | 10423     | 10423 <a href="#">[Sequence]</a> | 20092.0 | 0.0e+00 | 99.87 <a href="#">[Alignment]</a> |
| <a href="#">7:145426428-145434392 [Sequence]</a> | 10072      | 10422       | 18386     | 7965 <a href="#">[Sequence]</a>  | 15432.0 | 0.0e+00 | 99.94 <a href="#">[Alignment]</a> |

HSP distribution on genome

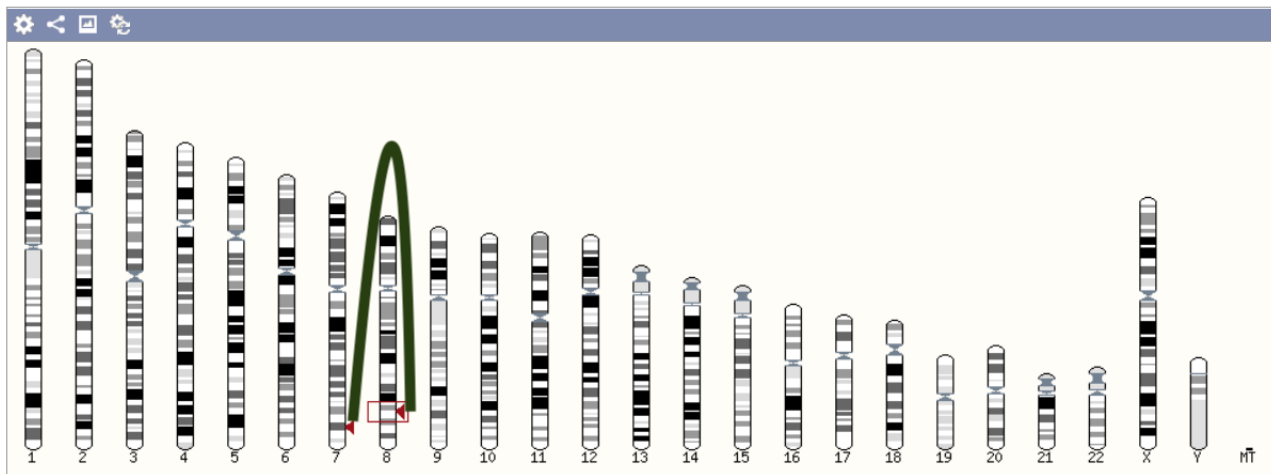

Supplementary Figure 1: Example of a chimeric contig detected by INTERVALMISS on the MINIA3 assembly of NA12878. INTERVALMISS identifies a lack of fragment coverage starting at base position 10,434 and ending at base position 10,540 of the contig 10072. A BLAST search on the human reference genome confirms the breakpoint occurring at the contig interval 10,422-10,423. In this case, the chimeric contig induces an erroneous inter-chromosome translocation between chromosomes 8 and 7. INTERVALMISS splits the chimeric MINIA3 contig at the flanking positions of the interval [10,433-10,540], originating in two new subcontigs covering the positions 1-10,432 and 10,541-18,386, and solving the breakpoint. The figure was generated using the ENSEMBL BLAST portal [[https://www.ensembl.org/Homo\\_sapiens/Tools/Blast](https://www.ensembl.org/Homo_sapiens/Tools/Blast)].

### Breakpoints detected by IntervalMiss

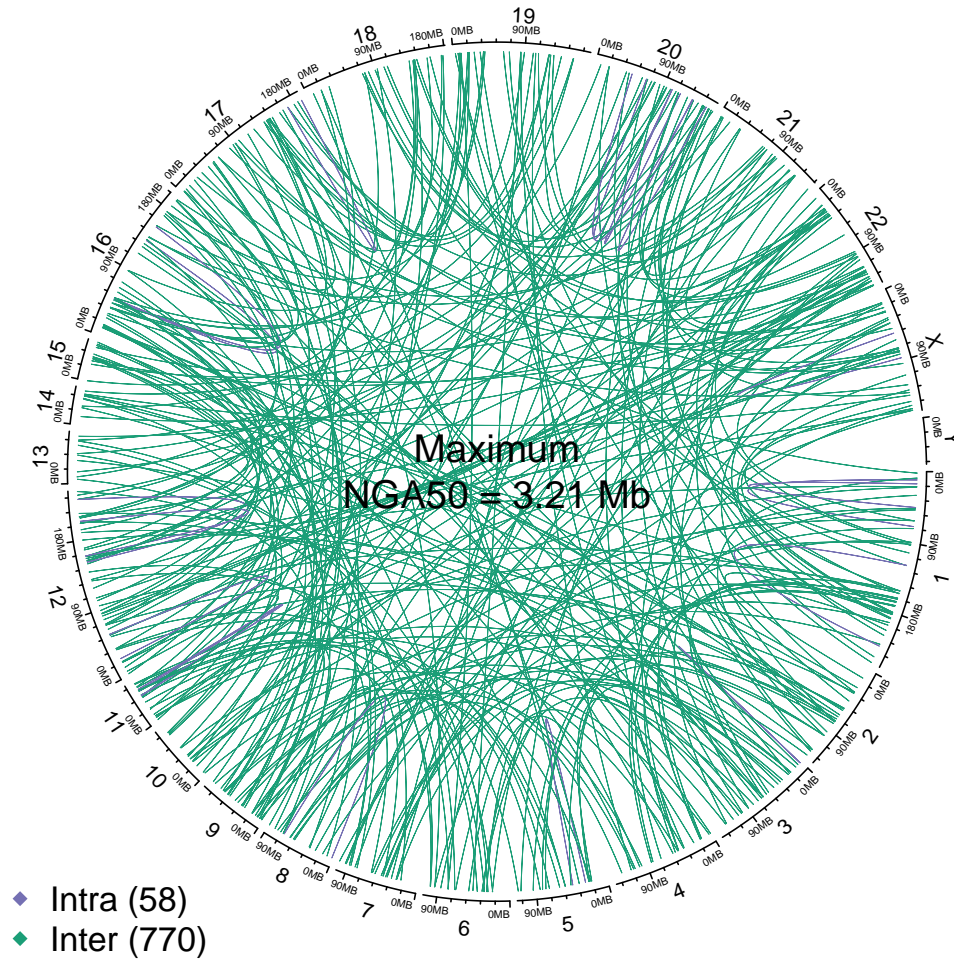

Supplementary Figure 2: The circular plot depicts the number of missassemblies detected using the pair-end information and the maximum NGA50 that can be achieved if those contigs are not corrected in the NA12878 MINIA3 short-read assembly.

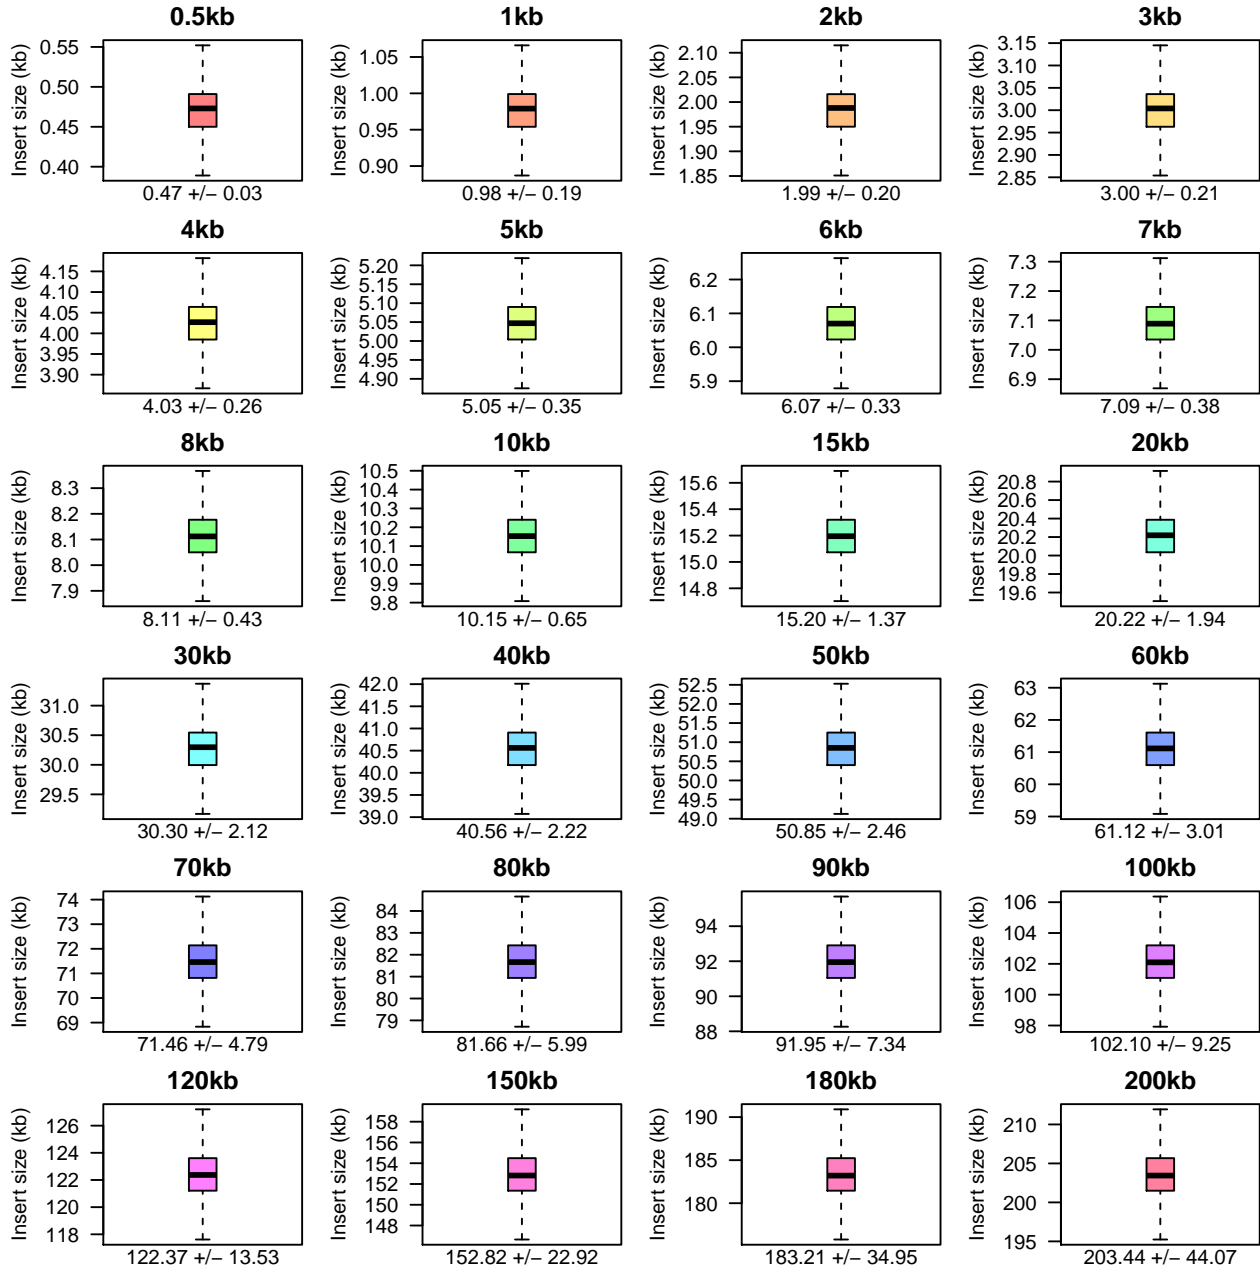

Supplementary Figure 3: Spectrum of synthetic mate-pair libraries generated by FASTMIN-SG from ultralong Nanopore reads of NA12878 (rel5). A maximum of 900,000 insert sizes were collected from the mate-pair reads aligned by FASTMIN-SG within contigs of the NA12878 (Discovar Assembly). A total of n=900,000 insert sizes were collected for libraries in the range of 0.5 to 120kb. A total of n=549,784, n=269,453, and n=169,884 insert sizes were collected for the 150kb, 180kb and 200kb libraries, respectively. The percentage of outlier synthetic pairs detected ranged from a minimum of 1.18% (0.5kb) to a maximum of 16.17% (200kb). The boxplots were drawn excluding outlier synthetic pairs. The median and the standard deviation are depicted below each boxplot (median +/- sd).

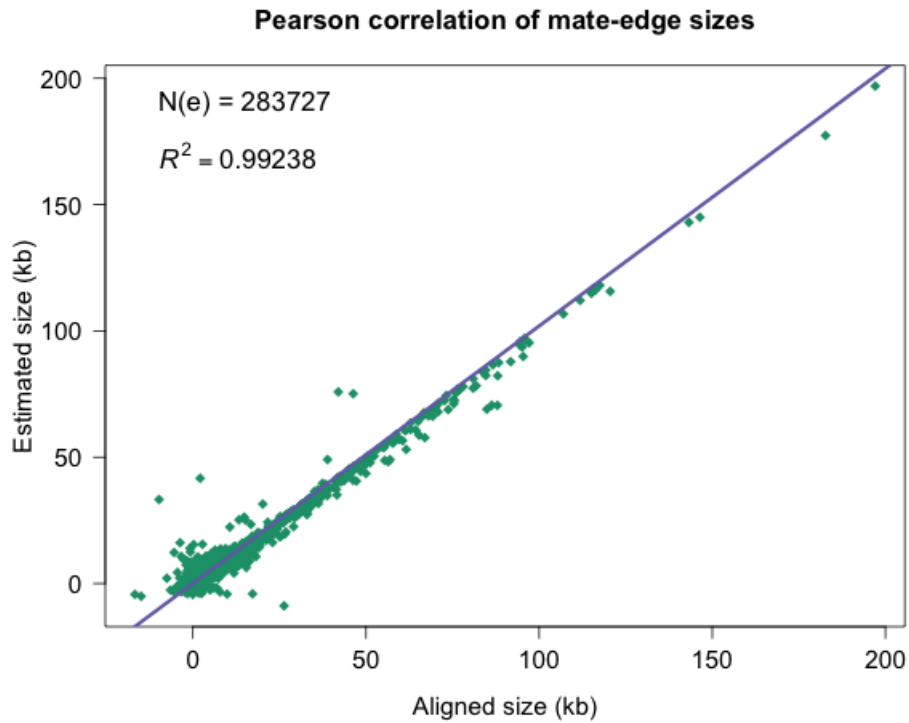

Supplementary Figure 4: The Pearson correlation of the mate-edge lengths before (y-axis) and after (x-axis) building the consensus sequences for a total of  $n=283,727$  mate-edges from the NA12878 WENGAN<sub>M</sub> assembly is depicted. Notice that the agreement between the estimated and the aligned mate-edge lengths exceeds  $R^2 > 0.99$ .

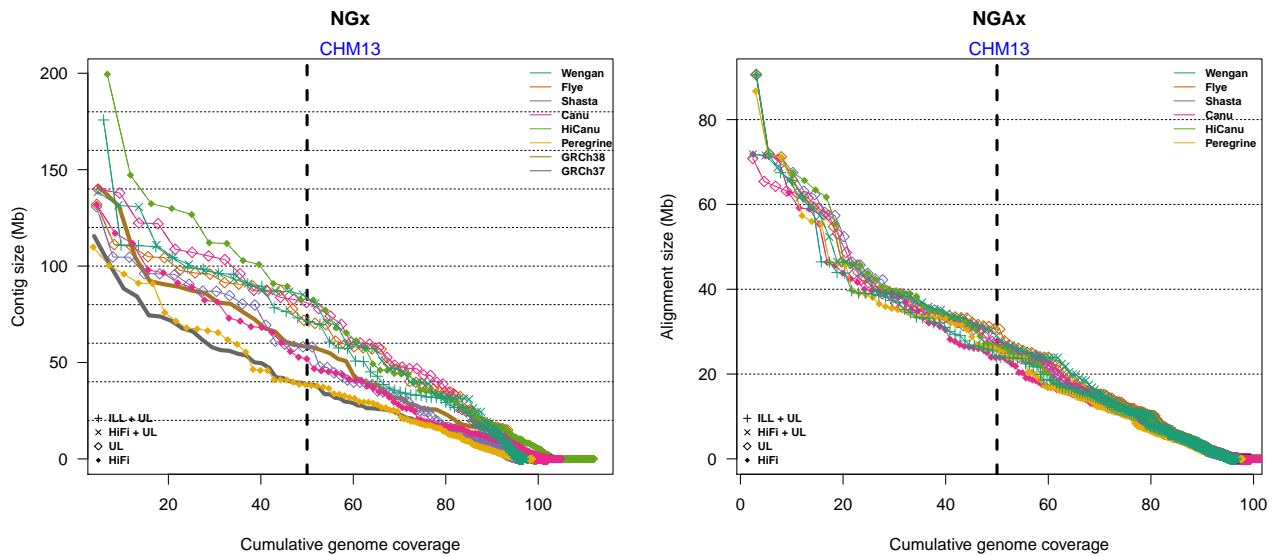

Supplementary Figure 5: QUAST NGx and NGAx of CHM13 assemblies.

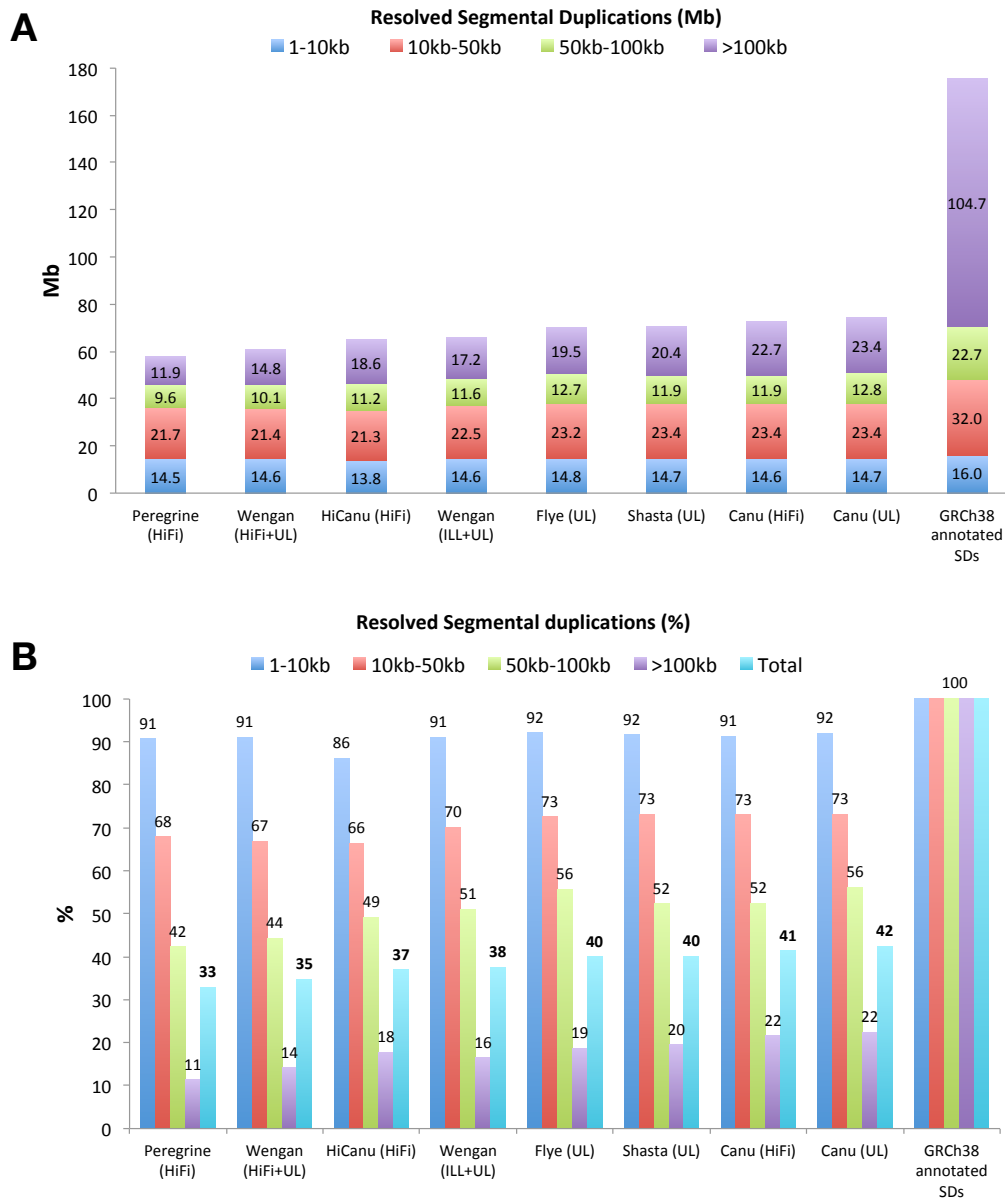

Supplementary Figure 6: Segmental Duplications (SD) resolved by different genome assemblies of CHM13. An SD is considered resolved if the aligned contig extends the SD flanking sequences by at least 50kb. A total of n=8,048 SDs with a total sequence length of 175.4Mb were assessed. A) The stacked plot displays the amount (Mb) of SD sequences resolved binned by length (1-10kb,10-50kb,50-100kb,>100kb) for the assemblies and the GRCh38 reference genome. B) The barplot displays the percentage of SDs resolved binned by length relative to the GRCh38 reference.

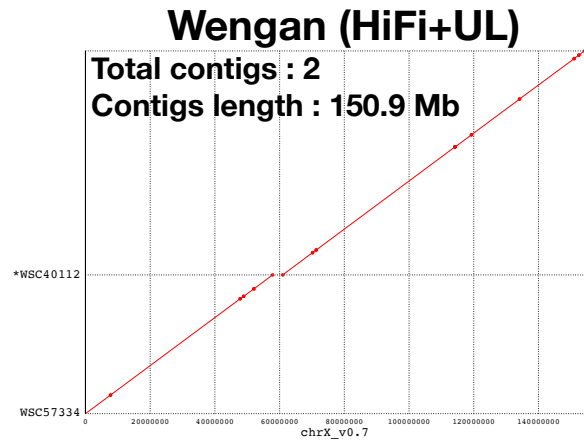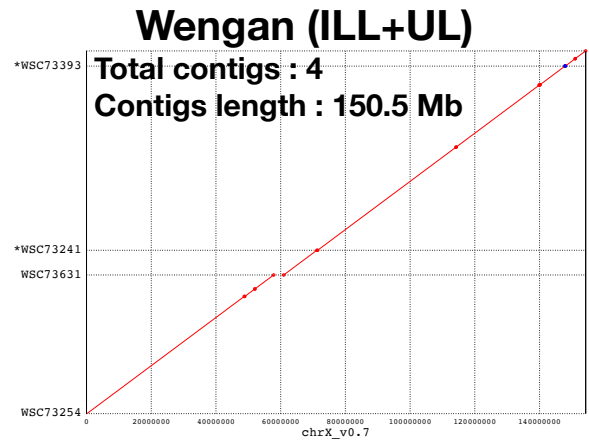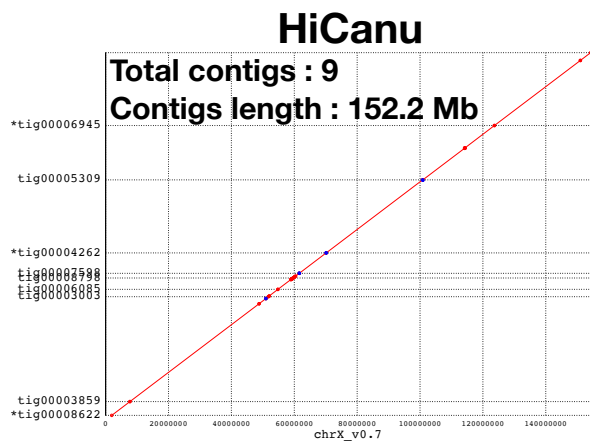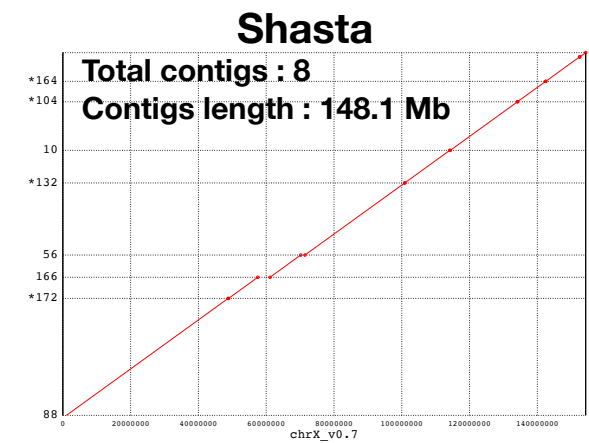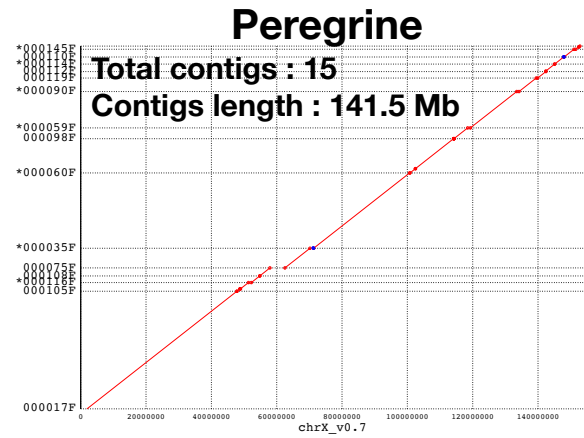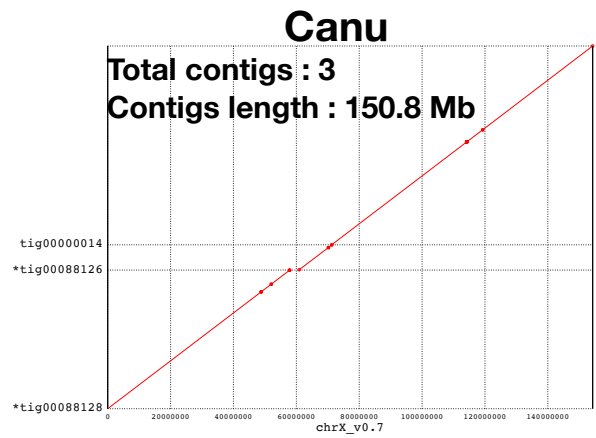

Supplementary Figure 7: Assembled contigs were aligned to the T2T-X chromosome using MASH version 2.0 (" -r chrX.t2t.fa -f one-to-one -q asm.fa -s 10000 -pi 85"). Contigs with an alignment block  $\geq 1$  Mb at an average identity  $\geq 98\%$  were anchored to the CHM13 T2T-X chromosome (v.07). Anchored contigs were then masked using REPEATMASKER.

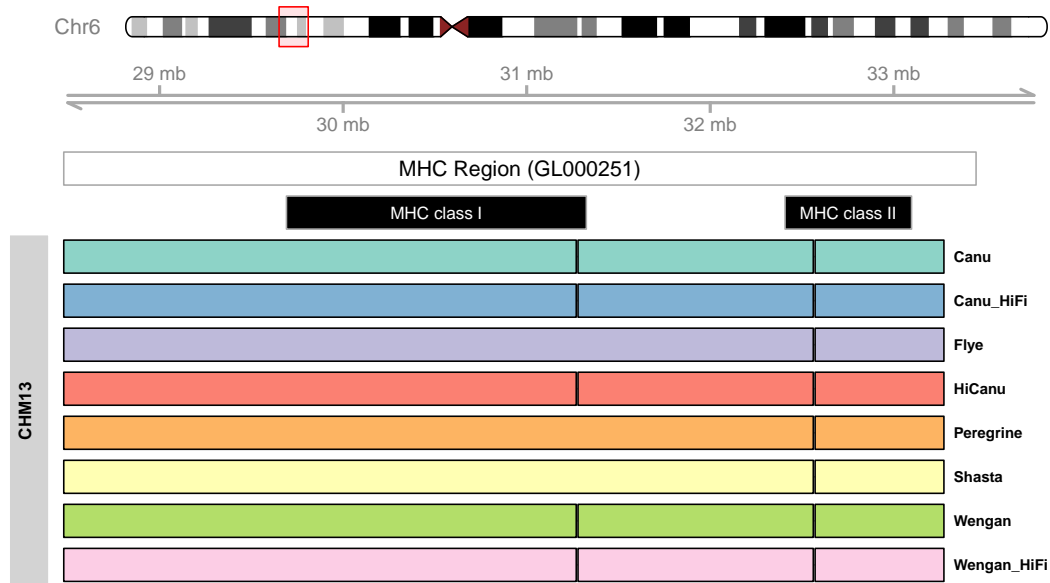

Supplementary Figure 8: All the evaluated assemblers span the MHC region in a single contig. The SHASTA, PEREGRINE and FLYE assemblies reach the higher NGA50 with a value of 4.08Mb. The WENGAN and CANU assemblies reach an NGA50 of 2.79Mb. The WENGAN(HiFi+UL) contig that spans the MHC region is WSC27686[1,636,665-6,427,628], with a total length of 31.5Mb. The sequence of the GL000251.2 haplogroup was used as the closed reference for CHM13. The GL000251.2 sequence was aligned to the genome assemblies and the aligned blocks  $\geq 30\text{kb}$  with a minimum identity of 95% were kept. The alignment breakpoints (vertical black lines) indicate a contig switch, alignment error or gap in the assembly.

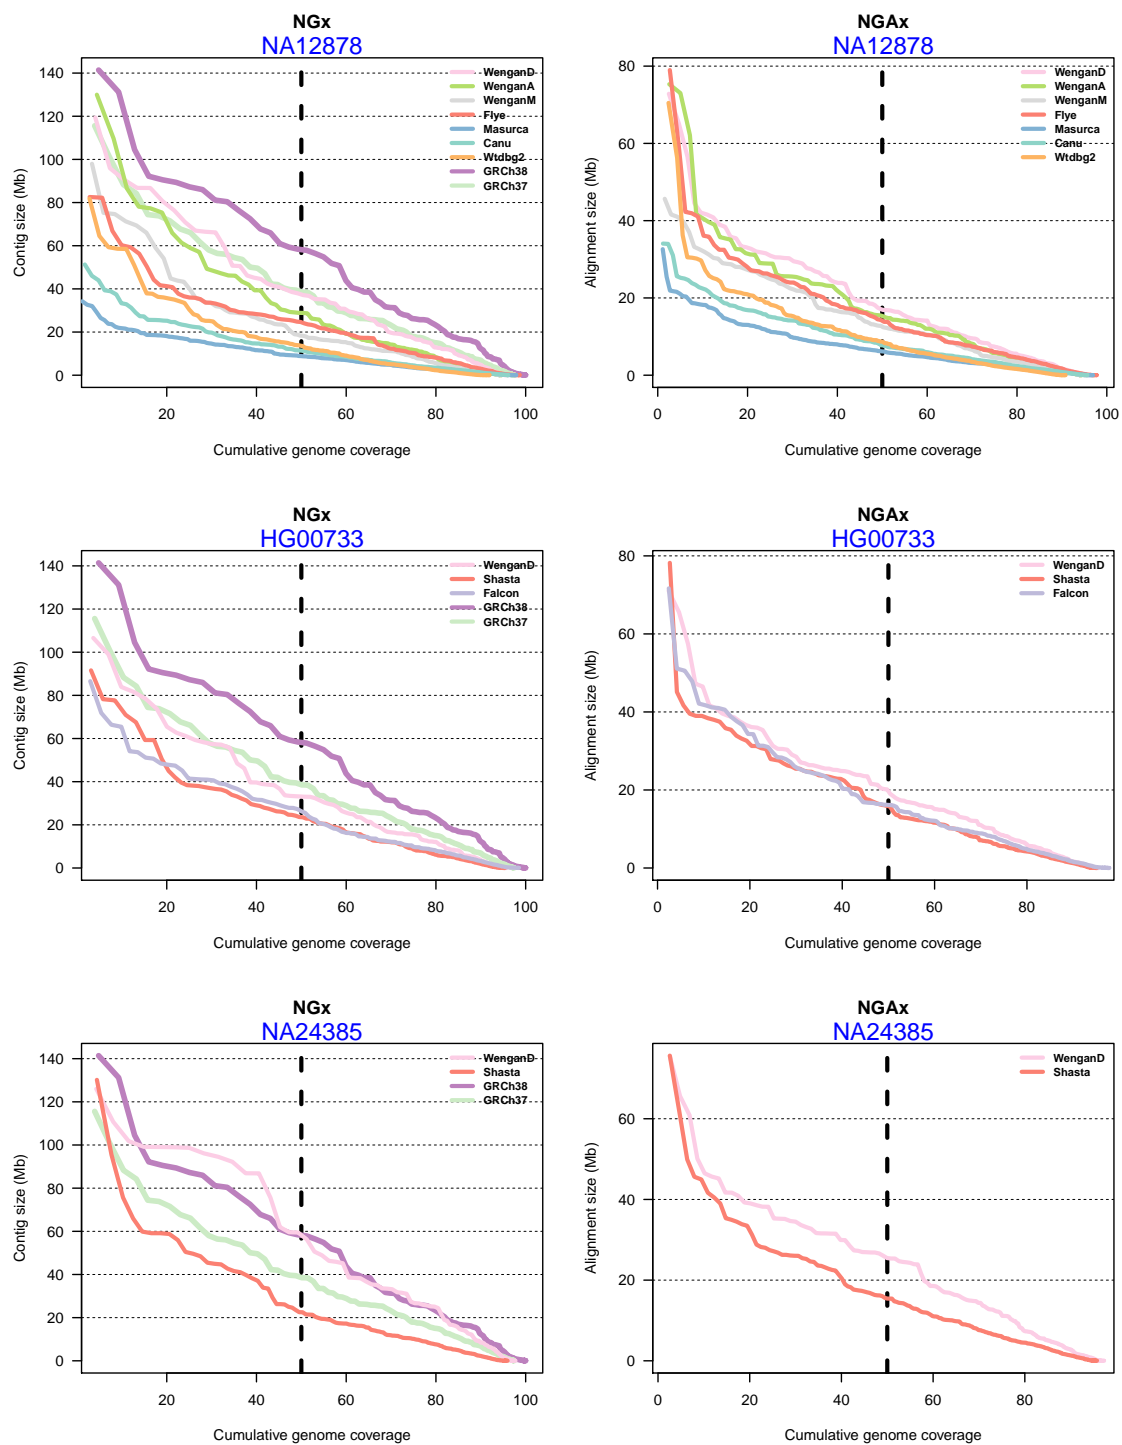

Supplementary Figure 9: QUAST NGx and NGAx of NA12878, HG00733, and NA24385 assemblies.



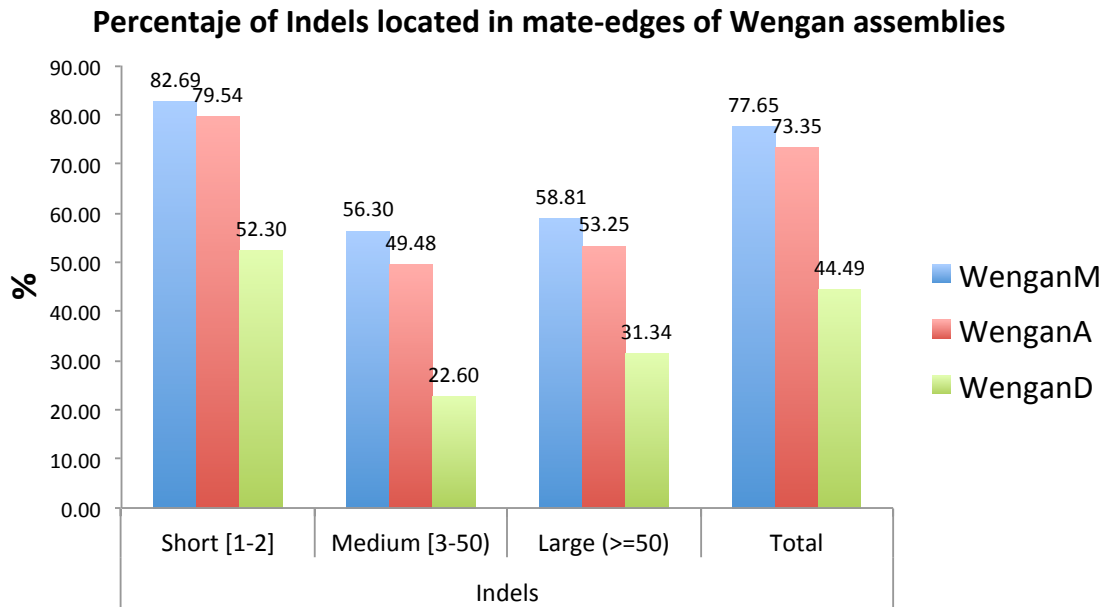

Supplementary Figure 10: Distribution of the WENGAN consensus errors of the hybrid assemblies of NA12878 generated with Illumina (2x150 and 2x250) and ultralong Nanopore reads (rel5). The total number of short, medium and large indels are 1,990,947; 454,484; 17,954 for WENGANM, 1,722,477; 431,273; 18,733 for WENGANA, and 854,330; 294,128; 17,744 for WENGAND. The majority of the consensus errors are located in the long-read consensus sequences of mate-edges. The size of such sequences ranges from 80Mb (WENGAND) to 270Mb (WENGANM) per assembly, thus reducing the amount of sequence to be polished by at least 90%.

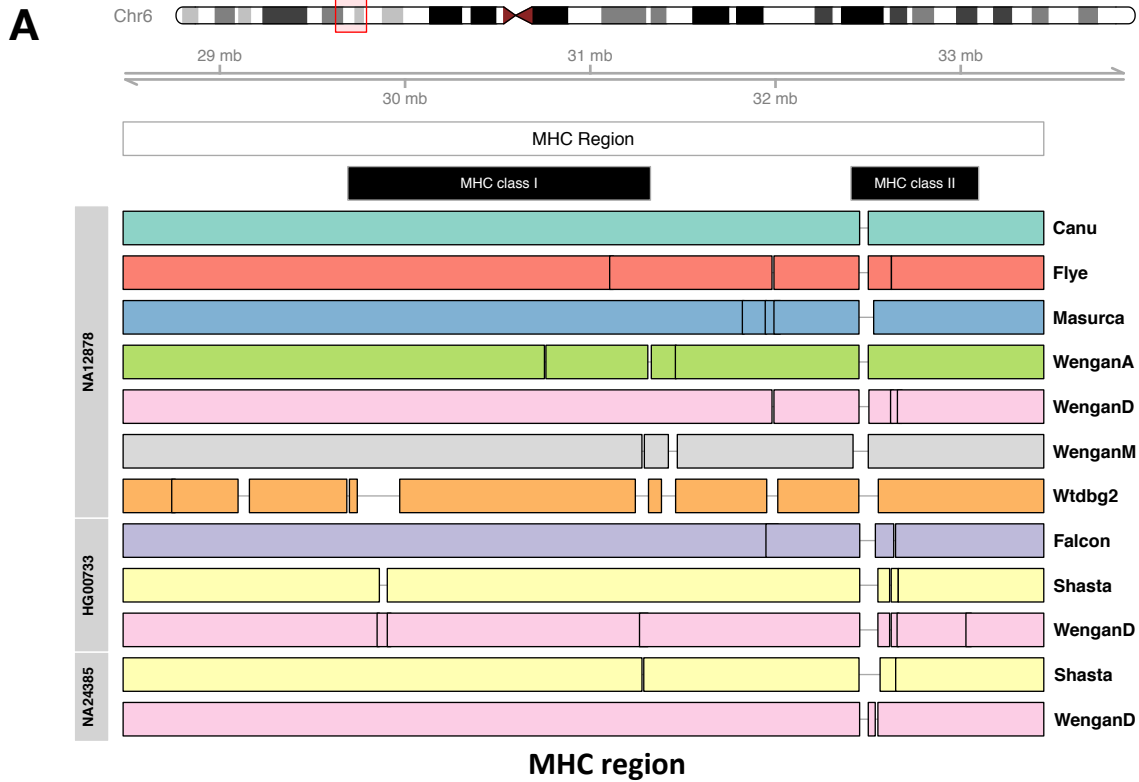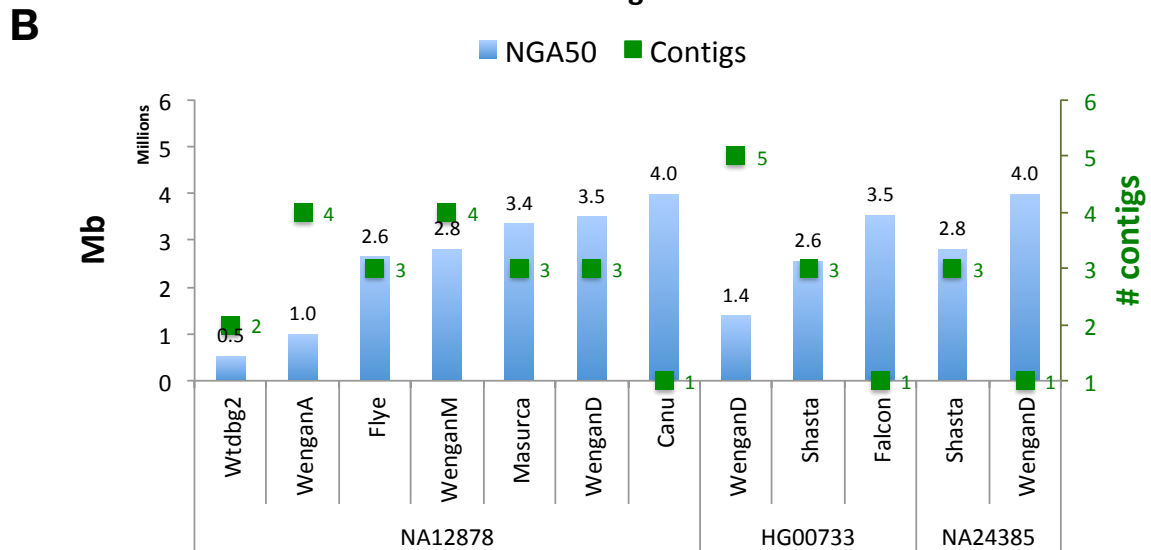

Supplementary Figure 11: Assembly of the complex MHC region in NA12878, HG00733 and NA24385 genomes. A) The MHC sequence was aligned to the genome assemblies and the aligned blocks  $\geq 30$ kb with a minimum identity of 95% were kept. The alignment breakpoints (vertical black lines) indicate a contig switch, alignment error or gap in the assembly. B) The NGA50 and the number of contigs spanning the MHC region of each diploid assembly are depicted. NGA50 is NG50 corrected of assembly errors. The NGA50 was computed using a genome size equal to the length of the MHC region ( $n=4.97$ Mb).

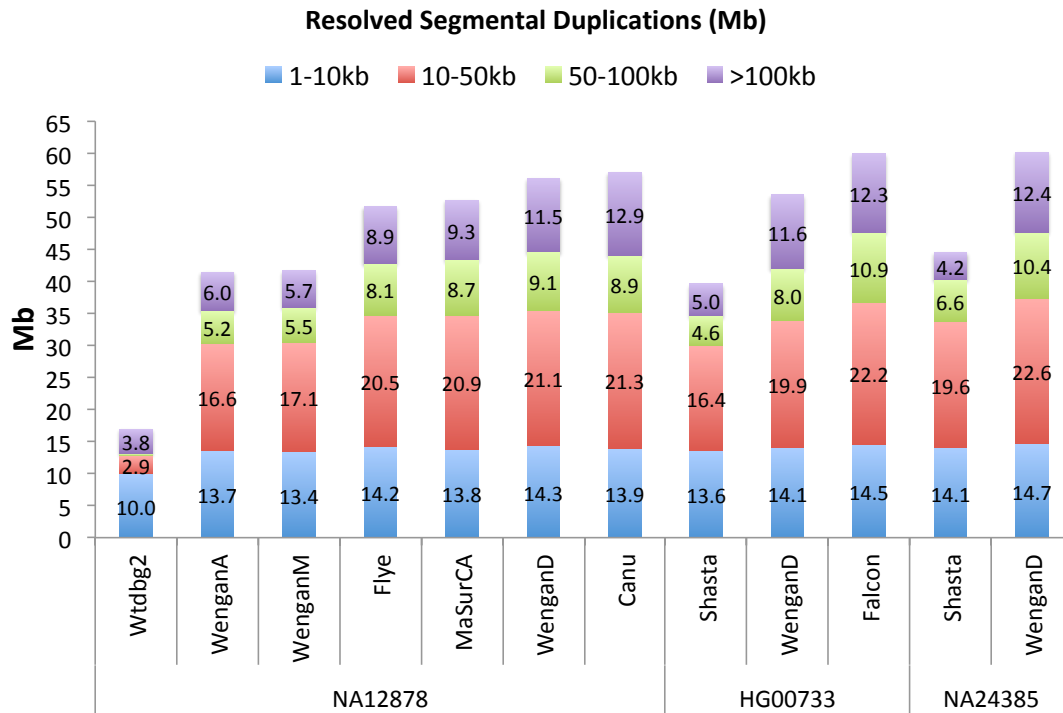

Supplementary Figure 12: An SD is considered resolved if the aligned contig extends the SD flanking sequences by at least 50kb. A total of n=8,048 SDs with a total sequence length of 175.4Mb were assessed. The stacked plot displays the amount (Mb) of SD sequences resolved binned by length (1-10kb,10-50kb,50-100kb,>100kb) for each assembly.

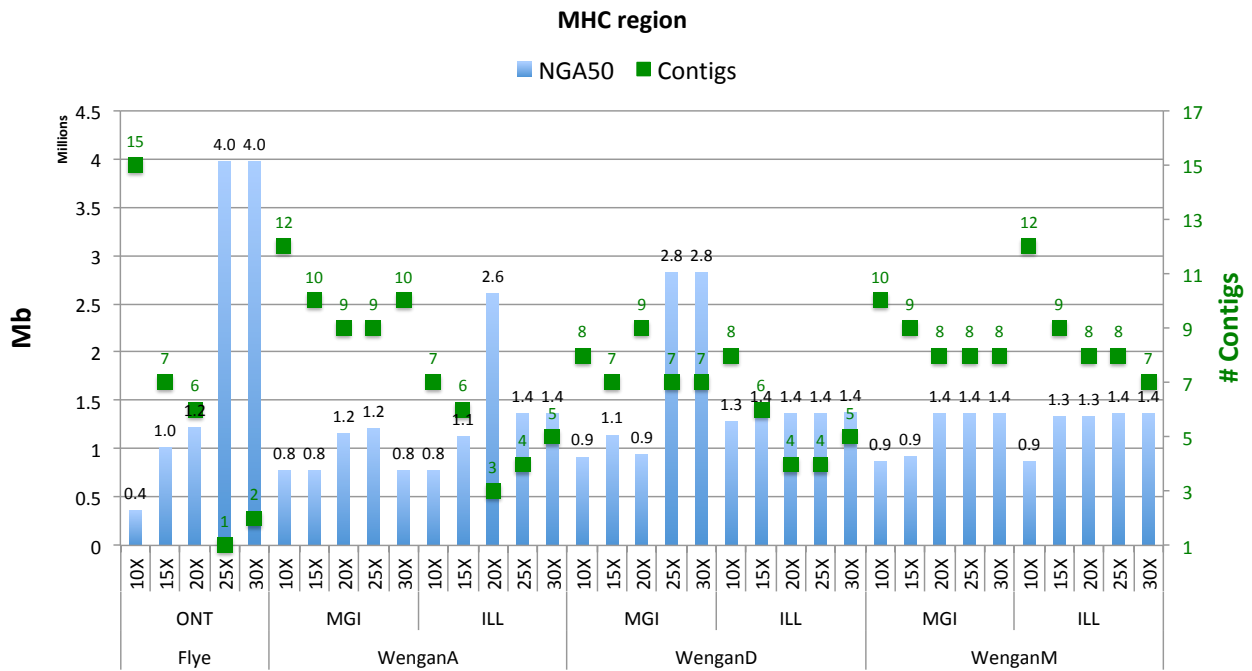

Supplementary Figure 13: Assembly of the complex MHC region at different long-read coverage. The NGA50 and the number of contigs spanning the MHC region of each assembly of NA12878 are depicted. NGA50 is NG50 corrected of assembly errors. The NGA50 was computed using a genome size equal to the length of the MHC region (n=4.97Mb).
